# Supplementary material for: Comparison of the EQ-5D 3L and the SF-6D (SF-36) contemporaneous utility scores in patients with chronic kidney disease in Sri Lanka: a cross-sectional survey
Source: PubMed Central journal article supplement — BMJ Open. 2019 Feb 15;9(2):e024854. doi: 10.1136/bmjopen-2018-024854 (PMC6398797; doi:10.1136/bmjopen-2018-024854), 2019-02-15
Supplement: bmjopen-2018-024854.draft_revisions.pdf [file bmjopen-2018-024854.draft_revisions.pdf]

# BMJ Open

BMJ Open is committed to open peer review. As part of this commitment we make the peer review history of every article we publish publicly available.

When an article is published we post the peer reviewers' comments and the authors' responses online. We also post the versions of the paper that were used during peer review. These are the versions that the peer review comments apply to.

The versions of the paper that follow are the versions that were submitted during the peer review process. They are not the versions of record or the final published versions. They should not be cited or distributed as the published version of this manuscript.

BMJ Open is an open access journal and the full, final, typeset and author-corrected version of record of the manuscript is available on our site with no access controls, subscription charges or pay-per-view fees (<http://bmjopen.bmj.com>).

If you have any questions on BMJ Open's open peer review process please email [info.bmjopen@bmj.com](mailto:info.bmjopen@bmj.com)

# BMJ Open

## Comparison of the EQ-5D-3L and the SF-6D (SF-36) contemporaneous utility scores in patients with Chronic Kidney Disease

|                               |                                                                                                                                                                                                                                                                                                                                                                                       |
|-------------------------------|---------------------------------------------------------------------------------------------------------------------------------------------------------------------------------------------------------------------------------------------------------------------------------------------------------------------------------------------------------------------------------------|
| Journal:                      | <i>BMJ Open</i>                                                                                                                                                                                                                                                                                                                                                                       |
| Manuscript ID                 | bmjopen-2018-024854                                                                                                                                                                                                                                                                                                                                                                   |
| Article Type:                 | Research                                                                                                                                                                                                                                                                                                                                                                              |
| Date Submitted by the Author: | 18-Jun-2018                                                                                                                                                                                                                                                                                                                                                                           |
| Complete List of Authors:     | Kularatna, Sanjeewa; Australian Centre For Health Services Innovation, Queensland University of Technology<br>Senanayake, Sameera; Australian Centre For Health Services Innovation, Queensland University of Technology<br>Gunawardena, Nalika; World Health Organization<br>Graves, Nicholas; Australian Centre For Health Services Innovation, Queensland University of Technology |
| Keywords:                     | Cost utility analysis, Quality-Adjusted Life Years (QALYs), utility, Chronic Kidney Disease (CKD)                                                                                                                                                                                                                                                                                     |
|                               |                                                                                                                                                                                                                                                                                                                                                                                       |

SCHOLARONE™  
Manuscripts

Peer Review Only

1 **Comparison of the EQ-5D-3L and the SF-6D (SF-36) contemporaneous utility scores in**  
2 **patients with Chronic Kidney Disease**  
3

4  
5  
6 *Sanjeewa Kularatna<sup>1</sup>, Sameera Senanayake<sup>1</sup>, Nalika Gunawardena<sup>2</sup>, Nicholas Graves<sup>1</sup>*  
7

8  
9 *<sup>1</sup>Australian Centre for Health Services Innovation, Queensland University of Technology*

10 *<sup>2</sup> World Health Organization, Sri Lanka*  
11  
12  
13

14 **Corresponding author;**

15 Sanjeewa Kularatna - *sanjeewa.kularatna@qut.edu.au*  
16  
17

18  
19 **Word count : 3277**  
20  
21  
22  
23  
24  
25  
26  
27  
28  
29  
30  
31  
32  
33  
34  
35  
36  
37  
38  
39  
40  
41  
42  
43  
44  
45  
46  
47  
48  
49  
50  
51  
52  
53  
54  
55  
56  
57  
58  
59  
60

## Abstract

**Objectives :** The aim of this study was to compare utility weights of EQ-5D-3L and SF-6D in a representative cohort of patients with Chronic Kidney Disease (CKD). A cost-utility analysis is designed to report the change to costs required to achieve an estimated change to Quality-Adjusted Life Years (QALYs). The quality component of a QALY is measured by utility. Utility represents the preference of general population for a given health state. Classification systems of the multi-attribute utility instruments (MAUI) are used to define these health states. Utility weights developed from different classification systems can vary and so might affect the conclusions from cost-utility analyses.

**Design:** A community based cross sectional study

**Setting :** Anuradhapura a rural district in Sri Lanka.

**Participants:** A representative sample of 1096 CKD patients completed the EQ-5D-3L and SF-36 from which the SF-6D was constructed according to the published algorithm. The study assessed discrimination, correlation and differences across the two instruments.

**Results:** Study participants were predominantly male (62.6%). Mean EQ-5D-3L utility score was 0.540 (SD 0.35) compared with 0.534(0.09) for the SF-6D ( $p=0.588$ ). The correlation ( $r$ ) between the scores was 0.40 ( $p<0.001$ ). Utility scores were significantly different in both males and females between the two tools, but there was no difference in age and educational categories. Both MAUI scores decreased significantly ( $p<0.001$ ;ANOVA) with advancing CKD stage and the corresponding utility scores of the two instruments in different CKD stages were also significantly ( $p<0.05$ ) different. The largest effect size was seen among the dialysis patients.

**Conclusions:** The correlation between the scores was moderate. Both tools were able to discriminate advancement of CKD stages. Findings indicate that both the tools cover different spaces in health. Thus, although there was a moderate correlation between the measures, both scores cannot be used interchangeably while assessing QALY during cost utility analysis.

**Key words:** Cost utility analysis, Quality-Adjusted Life Years (QALYs), utility, Chronic Kidney Disease (CKD)

## Article summary

### Strengths and limitations of this study

- This is the first study to compare the utility scores arising from the EQ-5D-3L and SF-6D in Chronic Kidney Disease patients
- This is the first study to demonstrate that EQ-5D-3L and SF-6D tools cover different spaces in health among CKD patients.
- Our study was a cross-sectional study, thus we could not assess which utility scores of the two instruments change over time.

For peer review only

## Introduction

Chronic kidney disease (CKD) is a substantial public health problem with adverse psychological, physical and economic outcomes. The burden of CKD is increasing globally(1). World Health Report (2002) and Global Burden of Disease (GBD) project stated that the diseases of the kidney contribute to the global disease burden with approximately 850,000 deaths every year globally (2). Furthermore, according to GBD study conducted in 2010, out of the top causes of DALY, CKD is ranked 29<sup>th</sup> globally, 23<sup>rd</sup> in South East Asia and 14<sup>th</sup> in Sri Lanka (3). Due to the progressive and disabling nature of CKD it has substantial impact on the quality of life (QOL) of individuals. It is important to measure QOL indicators for the management of chronic kidney disease patients. Several studies demonstrate a relationship between reduced QOL and increased morbidity and mortality (4-7).

World over, the importance of including QOL indicators in the clinical management of patients has been highlighted. This has come to the limelight after several studies demonstrated the strong relationship between reduced QOL and increased morbidity and mortality (5, 8). Meantime, economic evaluation has become increasingly popular among researchers and policy makers during resource allocation in recent years. Due to the relationship between QOL and clinical outcome, during the recent years, QOL has become an important health outcome in economic evaluations. In cost utility analysis (CUA), a method of economic evaluation, outcomes are usually measured in Quality-Adjusted Life Years (QALYs), which is a measure of QOL.

The concept of QALYs was developed in the 1970s. It can measure the changes of an individual's quality and quantity of life and can also aggregate these improvements across individual (9, 10). The change in the quality of life in QALY is measured using a set of weights, called utilities, which reflect different health states. For all possible health states, utilities should be measured on a scale where 1 refers to full health and 0 refers to death (11). Measuring utilities for different health states is complex and time-consuming. Thus, Multi Attribute Utility Instruments (MAUI) such as EuroQol-5D (EQ-5D-3L) (12), Short Form-6D (SF-6D) (13) or the Health Utility Index (HUI) (14, 15) are used to define different health states. The utility scores for different health states in different instruments are derived from methods such as Standard Gambling method (16), Discrete Choice Experiments (17) and Time Trade-Off experiments (18). EQ-5D-3L is the most widely used utility instrument at present (19). EQ-5D-5L, which is the newer version of EQ-5D, has also been developed and tested recently (20).

1  
2  
3 Since all the MAUIs aim at measuring the health state of individuals, all the instruments  
4 should generate the same utility value for a particular health state. However, the evidence  
5 indicates that there is essential difference in the utility scores for a particular health state  
6 between different instruments (19, 21-29). This, in turn, indicates that the choice of the  
7 MAUI used may adversely influence the results of CUA and thereby the decision-making  
8 process (30). Furthermore, for incremental analyses, use of different MAUIs may lead to  
9 different results regarding the magnitude, direction or significance of any change in health-  
10 related quality of life measure.  
11  
12  
13  
14  
15

16  
17 Though the differences of different MAUIs have been evaluated in many disease conditions  
18 (19, 21, 22, 24), there are no evidence in the literature comparing MAUIs using patients with  
19 CKD. The aim of our study is to compare contemporaneous EQ-5D-3L and SF-6D utility  
20 scores in patients with CKD. Results may be useful for researchers selecting a generic MAUI  
21 to estimate utilities for use in economic modelling of treatments for CKD.  
22  
23  
24  
25  
26

## 27 **Methods**

### 28 *Patients selection*

29  
30 A population-based descriptive cross-sectional study was conducted in the district of  
31 Anuradhapura in the North Central Province (NCP) of Sri Lanka. The study population  
32 consisted of 1162 confirmed CKD patients who were over 18 years old with documented  
33 evidence of CKD living in the Anuradhapura district. The diagnosis of CKD was made if the  
34 Glomerular Filtration Rate (GFR) was less than 60 ml/min per 1.73m<sup>2</sup> of body surface area  
35 in two measurements made three months apart.  
36  
37  
38  
39  
40

41  
42 The inclusion criteria were patients above 18 years of age and those who were diagnosed as  
43 having CKD by a specialist nephrologist or a consultant physician. Presence of evidence of  
44 such diagnosis was made by way of diagnosis cards, clinic records or any other record issued  
45 by a specialist nephrologist, a consultant physician or a government hospital. Patients who  
46 had previous renal transplantation, who were unable to provide rational information due to  
47 any cause (e.g. mental retardation) and who were critically ill but reliable information cannot  
48 be acquired from them were excluded from the study.  
49  
50  
51  
52  
53

54  
55 The data collectors assessed the eligibility of patients by reviewing their clinical records.  
56 Informed consent was obtained from those who were eligible for participation in the study.  
57  
58  
59  
60

1 The study was conducted in all nineteen Medical Officer of Health (MOH) areas of the  
2 Anuradhapura district. The number of participants to be included from each MOH area was  
3 based on probability proportionate to the size of CKD patients registered in each of the MOH  
4 areas. The required number of participants from each MOH area was selected using the  
5 simple random sampling method. The population-based CKD register – which records the  
6 patients with a confirmed diagnosis of CKD from renal clinics in hospitals of the NCP since  
7 2003 – was used as the sampling frame. The register was obtained from the office of the  
8 Provincial Director of Health Services (31).

### 15 *Calculation of utility scores*

16 Currently, there is no algorithm based on preferences of the Sri Lankan public to score the  
17 SF-6D on a utility scale. Therefore, the UK algorithm was used for this purpose (13).  
18 Though Sri Lankan EQ-5D-3L utility scores are available (18), the UK utility scores were  
19 used for the EQ-5D-3L (32) because of the unavailability of comparable Sri Lankan SF-6D  
20 utility scores as mentioned earlier. This allowed the comparison of utility scores from the  
21 same country.  
22  
23  
24  
25  
26

27  
28 The EQ-5D-3L instrument contains five domains; mobility, self-care, usual activities, pain /  
29 discomfort and anxiety / depression. Each domain has one item and each item has three  
30 levels: one denoting no problems and three denoting severe problems (12). Thus, EQ-5D-3L  
31 has mutually exclusive 243 different health states.  
32  
33  
34  
35

36 SF-6D is derived from SF-36, SF-12 Version 1 and SF-12 Version 2. The current study  
37 utilised SF-36 for the data collection. SF-36 includes 36 items that measure eight domains;  
38 role limitations caused by physical problems (4 items), physical function (10 items), role  
39 limitations caused by emotional problems (3 items), pain (2 items), social function (2 items),  
40 general health perceptions (5 items), emotional well-being (5 items) and energy / fatigue (4  
41 items). Questions have different answer options which range from two to seven. While  
42 scoring, each question is scored in a scale ranging from 0 (worst health) to 100 (best health).  
43 All items in a domain are summed up and averaged to give an average score for each domain  
44 which ranges from 0 (worst health) to 100 (best health). To calculate the utility scores of the  
45 SF-6D, 11 items are used covering six domains; physical functioning, role limitation, social  
46 functioning, pain, mental health and vitality (13).  
47  
48  
49  
50  
51  
52  
53  
54  
55

56 The EQ-5D-3L utility calculation was undertaken using the Stata syntax developed by  
57 Ramos-Goni et al. (33). The SF-6D scores were computed based on published algorithms  
58  
59



1 (13). Patients for whom one of the two measurements was missing were excluded from the  
2 analysis.  
3

4  
5  
6 The EQ-5D utility scores range from -0.59, 0=being dead; negative values represent health  
7 status considered worse than “dead”, to 1.00 which indicate good health status. Values close  
8 to zero indicate worse conditions, while 1.00 represents perfect health status. The SF-6D  
9 utility scores ranged from 1.0 which indicates no difficulty in any dimensions to 0.296 which  
10 indicate severely impaired levels in all dimensions.  
11  
12  
13

#### 14 *Data analysis*

15  
16 Stata 15.1 software was used for the analysis. Distribution of the socio-demographic  
17 characteristics of the study population was compared with their mean utility scores. Paired t-  
18 test was used to assess the difference between the two instruments in each socio-demographic  
19 class (34). Histograms were plotted for the two utility values distribution. Floor effects and  
20 ceiling (proportion of patients with the highest and lowest possible scores respectively) were  
21 calculated for the EQ-5D and SF-6D. Ceiling and floor effects were considered small if  
22  $\leq 15\%$  of patients occupy the best or worst health states, but they were considered serious if  
23  $> 15\%$  of patients occupy these states (35).  
24  
25  
26  
27  
28  
29  
30

31  
32 Currently, an established methodology to compare different MAUIs is not available. Thus,  
33 recently published methodologies, which compared different MAUIs, were followed in the  
34 current study (19, 23, 34). This included a combination of statistical and psychometric  
35 analyses to examine discrimination, agreement, differences and correlation between the two  
36 instruments.  
37  
38  
39  
40

#### 41 *Agreement and differences*

42  
43 The paired t-test was used to assess the difference between the EQ-5D-3L and SF-6D utility  
44 scores. Overall difference of the two utility scores as well as the difference of the utility  
45 scores according to different socio-demographic and disease related features were assessed.  
46  
47 Furthermore, the distribution of the responses to the different domains of the two instruments  
48 was tabulated to present the agreement and the differences between the two instruments.  
49  
50

#### 51 *Correlation*

52  
53 The dimensions of the two instruments were compared using Spearman correlation  
54 coefficient. The related dimensions between the two MAUIs are role limitation (SF-6D)/usual  
55 activities (EQ-5D-3L), physical functioning (SF-6D)/mobility and self-care (EQ-5D-3L),  
56 pain (SF-6D)/pain and discomfort (EQ-5D-3L), social functioning (SF-6D)/usual activities  
57  
58  
59

(EQ-5D-3L) and mental health (SF-6D)/anxiety and depression (EQ-5D-3L). The vitality dimension of the SF-6D did not have any related dimension with the EQ-5D-3L. The magnitude of the correlation coefficients were interpreted according to Guilford's criteria (36).

### *Discrimination*

It is important that MAUIs can discriminate correctly among groups of different severity as MAUIs are meant to measure improvement in QOL due to health improvement in the condition of interest.

Glomerular Filtration Rate (GFR) is the most important indicator of kidney function of patients with CKD (37). Studies have shown that decreased GFR is associated with infection, impaired cognitive and physical function as well as threats to patient safety (38). Though classifications exist to classify stages of CKD, it is evident that at present most of the clinical decision making in CKD is solely based on GFR base classification (39, 40). Depending on the GFR value, CKD is categorised into five stages; stage I to stage V. For analytical purposes, the CKD stages I to III were categorised as "early stage" in the present study. It is expected that with advanced stages of the disease, the utility scores should be lower than the early stages.

Discrimination of EQ-5D-3L and SF-6D for different CKD stages was examined using ANOVA and effect size. The instrument's ability to discriminate between two adjacent stages was estimated by calculating the effect size. The effect size was calculated by dividing the mean difference of two adjacent CKD stages by the standard deviation of the milder of the two CKD stages (41). Large effect size indicates better discriminating ability of the instrument. The effect size was categorised into small (0.2–0.5), medium (0.5–0.8) and large (more than 0.8) (42).

### *Test-retest reliability*

To assess the test-retest reliability of the study instrument, within a period of one week, 30 randomly selected study participants were visited at their households by the data collectors. Test re-test reliability of the utility scores of the two instruments was assessed using Spearman's  $r$  correlation coefficient and a value of 0.70 or greater was considered as satisfactory reliability (43).

## **Results**

### *Sample characteristics*

1 Out of 1162 participants selected to be included in the study, 66 (5.6%) did not participate in  
2 the study giving a response rate of 94.4%. The mean age of the study population was 58.4  
3 years (Standard Deviation (SD) 10.8). There was a preponderance of males among the study  
4 population (62.6%, N=686). The mean eGFR of the population was 31.8 (SD 20.2)  
5 ml/min/1.73 m<sup>2</sup>. The mean number of years since diagnosed with CKD was found to be 4.1  
6 (SD 3.2) years. The majority of participants was in the later stages, stage 4 or beyond, of  
7 CKD (n=803; 73.2%). 38 participants (3.6%), with stage 5 of the disease and undergoing  
8 dialysis, were on haemodialysis (Table 1). Chronic Kidney Disease of Unknown origin  
9 (CKDu) was the cause of the CKD in most of the study population (n=489; 43.7%).  
10  
11  
12  
13  
14  
15

### 16 *Distribution of EQ-5D-3L and SF-6D utility scores*

17 The mean EQ-5D-3L utility score at baseline was 0.540 compared with 0.534 for the SF-6D  
18 as summarised in Table 1. The EQ-5D-3L utility score ranged from -0.594 to 1, while SF-6D  
19 ranged from 0.3 to 0.89. The median baseline values have different locations in their  
20 respective scoring ranges (Fig 1). The EQ-5D-3L showed 1.0% floor effect and 11.8% ceiling  
21 effect, while SF-6D had 0.0% floor and ceiling effects.  
22  
23  
24  
25  
26  
27

### 28 *Agreement, differences and correlation between the two utility scores*

29 There was no significant difference (p=0.588) between overall mean scores of the two utility  
30 instruments as well as different age categories (p>0.05) and different education statuses  
31 (p>0.05). Compared to SF-6D, the mean EQ-5D-3L utility scores were significantly higher  
32 among males (p=0.016), which included those who were employed (p<0.001), had no  
33 comorbidities (p<0.001) and had CKD stages earlier than stage V (p=0.042 and 0.015). The  
34 mean SF-6D utility scores were significantly higher among females (p=0.045), which  
35 included those who were not employed (p<0.001), had comorbidities (p=0.028) and were on  
36 dialysis (p<0.001) (Table 1). The standard deviation of the EQ-5D-3L was considerably  
37 larger than that of the SF-6D among all sub groups.  
38  
39  
40  
41  
42  
43  
44  
45

46 Significant proportion of the patients reported “no problem” in any of the EQ-5D-3L  
47 dimensions than the SF-6D. However, fewer patients reported “extreme problems” in the EQ-  
48 5D-3L than in the SF-6D (Tables 2 and 3). Patients reported different results for the related  
49 dimensions of the two MAUIs (Tables 2 and 3). Nearly half of the patients reported “no  
50 problem” in Mobility domain of the EQ-5D-3L, while only 0.7% reported “no problems”  
51 with the physical functioning of the SF-6D. Nearly quarter (23.8%) of patients reported “no  
52 problems” for the anxiety / depression dimension in the EQ-5D-3L, whereas only 0.6%  
53 reported the same for the mental health dimension of the SF-6D.  
54  
55  
56  
57  
58  
59

1  
2  
3 The correlation between EQ-5D-3L and SF-6D was 0.408, which was statistically significant  
4 at  $p < 0.001$  level (Figure 2). Regarding the correlation between different domains of the two  
5 instruments, according to the Guilford's criteria, low level of correlation (0.2-0.4) was seen  
6 between Mobility and Physical functioning (0.3249), Social functioning (0.3672) and Pain  
7 (0.3607); between Usual activities and Social functioning (0.3152); between Pain/ discomfort  
8 and Physical functioning (0.3123), Pain ( 0.3567) and Vitality (0.3420); between Anxiety/  
9 depression and Social functioning (0.3656), Pain (0.3495) and Vitality (0.3136). Also,  
10 moderate correlation (0.4-0.6) was evident between Pain / discomfort and Social functioning  
11 (0.4090). All other domains were poorly correlated between the two instruments (Table 4).  
12  
13  
14  
15  
16  
17

### 18 *Discrimination*

19  
20 With both MAUIs, utility scores decreased with increasing severity (as measured by CKD  
21 stage) (Table 5). In both MAUIs, the utility differences across CKD stages were statistically  
22 significant ( $p < 0.05$ ; ANOVA) indicating good discrimination. Figure 3 indicated the box-  
23 plots present the median, quartiles and extreme values for the EQ-5D and SF-6D utility  
24 scores for CKD stage. Furthermore, the calculated effect size between CKD early stage and  
25 stage IV was 0.071 and 0.141 for EQ-5D-3L and SF-6D respectively. The highest effect size  
26 was observed between CKD stage V and dialysis group, which was 0.807 for EQ-5D-3L and  
27 1.098 for SF-6D.  
28  
29  
30  
31  
32  
33

### 34 *Test-retest reliability*

35  
36 The test re-test Spearman's correlations was more than 0.9 for both the instruments indicating  
37 good test re-test reliability.  
38  
39  
40

## 41 **Discussion**

42  
43 The findings from this study are a comparison of utility scores arising from the EQ-5D-3L  
44 and SF-6D in CKD patients. Comparisons between utility scores of EQ-5D-3L and SF-6D are  
45 scarce in the literature. Moreover, this is the first such comparison among CKD patients.  
46 According to the current study, the correlation between the scores was moderate. Both tools  
47 were able to discriminate advancement of CKD stages. Effect size, which denoted the  
48 discriminating ability of different CKD stages, is highest when disease condition is advanced  
49 and the highest effect size was seen in SF-6D.  
50  
51  
52  
53  
54  
55

56 At present, there is no consensus on the methodology to compare the utility scores of  
57 different MAUIs. The present study adopted the methodologies used by Kularatna et al.  
58  
59

1 (2017) and Lamers et al. (2006) (19, 34). Only one time assessment of the utilities was done  
2 in the present study. Thus, the responsiveness of the two instruments was not assessed.  
3  
4 Though Sri Lankan EQ-5D-3L utility scores are available (18), yet we used the UK utility  
5 scores for the EQ-5D-3L (32) because of the unavailability of comparable Sri Lankan SF-6D  
6 utility scores. This is an accepted method of calculating the utility scores in the absence of  
7 country specific utilities. Two studies conducted in Netherlands (24) and Italy (21),  
8 comparing the utility scores of the two instruments, had used the UK derived EQ-5D-3L and  
9 SF-6D utility scores.  
10  
11  
12  
13  
14

15 The present study did not find any difference ( $p=0.588$ ) between the overall mean scores of  
16 the two utility instruments. This was similar to a study conducted among a group of  
17 HIV/AIDS patients (28), but different to several other studies available in the literature where  
18 different results have been reported. Significantly higher utility values for EQ-5D-3L were  
19 found among general population (29), cardio-vascular disease patients (19), rheumatoid  
20 arthritis patients (21) and patients with stable angina (16). However, in a study conducted  
21 among a group of patients with psychiatric disorders, significantly higher utility values were  
22 obtained for SF-6D instrument (24). These varying results could be due to different recall  
23 periods of the two instruments. EQ-5D-3L assessed the health status of the day of instrument  
24 administration while SF-6D, which was derived from SF-36, assessed the health status of the  
25 past 30 days.  
26  
27  
28  
29  
30  
31  
32  
33

34  
35 Though overall ceiling and floor effects of both instruments were small, significant ceiling  
36 effect was evident in the EQ-5D-3L. This was consistent with several other studies conducted  
37 elsewhere (16, 19, 44-46). This is mainly due to the fact that the EQ-5D-3L has limited  
38 response levels and the five level newer version of EQ-5D expected to improve the properties  
39 of the three-level in terms of reduced ceiling effects, increased reliability and improved  
40 ability to discriminate between different levels of health (47).  
41  
42  
43  
44  
45

46 Discrimination of EQ-5D-3L and SF-6D for different CKD stages was examined using  
47 ANOVA and effect size. In both MAUIs, the utility differences across CKD stages were  
48 statistically significant ( $p<0.05$ ; ANOVA) indicating good discrimination. However, the  
49 effect size was small for both the tools until the dialysis stage. At the dialysis stage, the effect  
50 size is large and this was highest in the SF-6D instrument. It could be due to the fact that  
51 CKD is considered asymptomatic until the later stages of the disease (48, 49) so that the  
52 instruments cannot discriminate different stages. According to a recent study conducted by  
53  
54  
55  
56  
57  
58  
59  
60

1 Jesky et al. (2016), the EQ-5D-3L utility scores of the adjacent pre-dialysis CKD stages were  
2 not found to be statistically significant (50).  
3  
4  
5

### 6 **Limitations**

7 Some of the information related to QOL in SF-36 is considered to be sensitive in nature and  
8 the fact that this information was obtained utilising an interviewer-administered questionnaire  
9 could have led to some under-reporting in the assessment of QOL though many measures  
10 were taken to minimize this issue. Our study was a cross-sectional study, thus we could not  
11 assess which utility scores of the two instruments change over time.  
12  
13  
14  
15

### 16 **Conclusions**

17 The correlation between the scores was moderate. Both tools were able to discriminate  
18 advancement of CKD stages. Effect size, which denoted the discriminating ability of the  
19 different CKD stages, is highest when disease condition is advanced and the highest effect  
20 size was seen in SF-6D. Findings indicate that both tools cover different spaces in health.  
21 Thus, although there was a moderate correlation between the measures, both scores cannot be  
22 used interchangeably while assessing QALY during cost utility analysis.  
23  
24  
25  
26  
27  
28  
29

### 30 *Ethics approval and consent to participate*

31 The study is in accordance with Helsinki Declaration. The study protocol has been approved  
32 by the Ethics Committee of Colombo Medical Faculty. Permission was obtained from the  
33 Provincial Director of Health Service, to assess the CKD register available at his office.  
34 Participants gave their informed consent.  
35  
36  
37  
38  
39

### 40 *Funding*

41 This study was funded by the Ministry of Health, Sri Lanka  
42  
43  
44

45 *Competing interests:* None declared.  
46  
47

48 *Patient consent :* Obtained.  
49  
50

### 51 *Author Contributions*

52 SK and SS : Research idea, study design, statistical analysis and drafting of the manuscript.  
53 NG<sup>2</sup>: study design, data analysis/interpretation. NG<sup>1</sup>: participated in study design, data  
54 interpretation and supervision. All authors read and approved the final manuscript.  
55  
56  
57  
58  
59



1 *Provenance and peer review* : Not commissioned; externally peer reviewed.

2  
3  
4 *Data sharing statement*

5 The datasets used and/or analysed during the current study available from the corresponding  
6 author on reasonable request.  
7  
8  
9

10  
11 **References**

- 12 1. Senanayake S, Gunawardena N, Palihawadana P, Kularatna S, Peiris T. Validity and reliability  
13 of the Sri Lankan version of the kidney disease quality of life questionnaire (KDQOL-SF™).  
14 Health and quality of life outcomes. 2017;15(1):119.
- 15 2. Schieppati A, Remuzzi G. Chronic renal diseases as a public health problem: epidemiology,  
16 social, and economic implications. *Kidney International*. 2005;68:S7-S10.
- 17 3. Evaluation IfHMA. Global Burden of Disease 2010 Arrow Diagram: Institute for Health Metrics  
18 and Evaluation; 2010 [Available from: <http://vizhub.healthdata.org/irank/arrow.php>.  
19
- 20 4. Rebollo-Rubio A, Morales-Asencio JM, Pons-Raventos ME, Mansilla-Francisco JJ. Review of  
21 studies on health related quality of life in patients with advanced chronic kidney disease in  
22 Spain. *Nefrologia*. 2015;35(1):92-109.
- 23 5. Mujais SK, Story K, Brouillette J, Takano T, Soroka S, Franek C, et al. Health-related quality  
24 of life in CKD patients: correlates and evolution over time. *Clinical Journal of the American*  
25 *Society of Nephrology*. 2009;4(8):1293-301.
- 26 6. Tsai Y-C, Hung C-C, Hwang S-J, Wang S-L, Hsiao S-M, Lin M-Y, et al. Quality of life  
27 predicts risks of end-stage renal disease and mortality in patients with chronic kidney disease.  
28 *Nephrology dialysis transplantation*. 2009;25(5):1621-6.
- 29 7. DeOreo PB. Hemodialysis patient-assessed functional health status predicts continued survival,  
30 hospitalization, and dialysis-attendance compliance. *American Journal of Kidney Diseases*.  
31 1997;30(2):204-12.
- 32 8. Gussous Y, Theologis AA, Demb JB, Tangtiphaiboontana J, Berven S. Correlation Between  
33 Lumbopelvic and Sagittal Parameters and Health-Related Quality of Life in Adults With  
34 Lumbosacral Spondylolisthesis. *Global spine journal*. 2018;8(1):17-24.
- 35 9. Howren MB. Quality-Adjusted Life Years (QALYs). *Encyclopedia of Behavioral Medicine*:  
36 Springer; 2013. p. 1605-6.
- 37 10. Torrance GW, Feeny D. Utilities and quality-adjusted life years. *International journal of*  
38 *technology assessment in health care*. 1989;5(4):559-75.
- 39 11. Drummond MF, Sculpher MJ, Claxton K, Stoddart GL, Torrance GW. *Methods for the*  
40 *economic evaluation of health care programmes*: Oxford university press; 2015.
- 41 12. Brooks R. EuroQol: the current state of play. *Health policy*. 1996;37(1):53-72.
- 42 13. Brazier J, Roberts J, Deverill M. The estimation of a preference-based measure of health from  
43 the SF-36. *Journal of health economics*. 2002;21(2):271-92.
- 44  
45  
46  
47  
48  
49  
50  
51  
52  
53  
54  
55  
56  
57  
58  
59

- 1 14. Feeny D, Furlong W, Torrance GW, Goldsmith CH, Zhu Z, DePauw S, et al. Multiattribute and  
2 single-attribute utility functions for the health utilities index mark 3 system. *Medical care*.  
3 2002;40(2):113-28.
- 4 15. Feeny D, Furlong W, Boyle M, Torrance GW. Multi-attribute health status classification  
5 systems. *Pharmacoeconomics*. 1995;7(6):490-502.
- 6 16. Wu J, Han Y, Zhao F-L, Zhou J, Chen Z, Sun H. Validation and comparison of EuroQoL-5  
7 dimension (EQ-5D) and Short Form-6 dimension (SF-6D) among stable angina patients. *Health  
8 and quality of life outcomes*. 2014;12(1):156.
- 9 17. Stolk EA, Oppe M, Scalone L, Krabbe PF. Discrete choice modeling for the quantification of  
10 health states: the case of the EQ-5D. *Value in Health*. 2010;13(8):1005-13.
- 11 18. Kularatna S, Whitty JA, Johnson NW, Jayasinghe R, Scuffham PA. Valuing EQ-5D health  
12 states for Sri Lanka. *Quality of Life Research*. 2015;24(7):1785-93.
- 13 19. Kularatna S, Byrnes J, Chan YK, Ski CF, Carrington M, Thompson D, et al. Comparison of the  
14 EQ-5D-3L and the SF-6D (SF-12) contemporaneous utility scores in patients with  
15 cardiovascular disease. *Quality of Life Research*. 2017;26(12):3399-408.
- 16 20. Herdman M, Gudex C, Lloyd A, Janssen M, Kind P, Parkin D, et al. Development and  
17 preliminary testing of the new five-level version of EQ-5D (EQ-5D-5L). *Quality of life  
18 research*. 2011;20(10):1727-36.
- 19 21. Salaffi F, Carotti M, Ciapetti A, Gasparini S, Grassi W. A comparison of utility measurement  
20 using EQ-5D and SF-6D preference-based generic instruments in patients with rheumatoid  
21 arthritis. *Clinical and experimental rheumatology*. 2011;29(4):661-71.
- 22 22. Kwakkenbos L, Franssen J, Vonk MC, Becker ES, Jeurissen M, van den Hoogen FH, et al. A  
23 comparison of the measurement properties and estimation of minimal important differences of  
24 the EQ-5D and SF-6D utility measures in patients with systemic sclerosis. *Clinical and  
25 experimental rheumatology*. 2013;31(2 Suppl 76):50-6.
- 26 23. Rowen D, Young T, Brazier J, Gaugris S. Comparison of generic, condition-specific, and  
27 mapped health state utility values for multiple myeloma cancer. *Value in Health*.  
28 2012;15(8):1059-68.
- 29 24. Lamers LM, Bouwmans CA, van Straten A, Donker MC, Hakkaart L. Comparison of EQ-5D  
30 and SF-6D utilities in mental health patients. *Health economics*. 2006;15(11):1229-36.
- 31 25. Barton GR, Bankart J, Davis AC. A comparison of the quality of life of hearing-impaired  
32 people as estimated by three different utility measures Un comparación de la calidad de vida de  
33 personas con trastornos auditivos estimada por tres diferentes medidas de utilidad. *International  
34 Journal of Audiology*. 2005;44(3):157-63.
- 35 26. Barton GR, Bankart J, Davis AC, Summerfield QA. Comparing utility scores before and after  
36 hearing-aid provision. *Applied health economics and health policy*. 2004;3(2):103-5.
- 37 27. van Stel HF, Buskens E. Comparison of the SF-6D and the EQ-5D in patients with coronary  
38 heart disease. *Health and Quality of Life Outcomes*. 2006;4(1):20.



- 1 28. Stavem K, Frøland SS, Hellum KB. Comparison of preference-based utilities of the 15D, EQ-  
2 5D and SF-6D in patients with HIV/AIDS. *Quality of Life Research*. 2005;14(4):971-80.
- 3
- 4 29. Petrou S, Hockley C. An investigation into the empirical validity of the EQ-5D and SF-6D  
5 based on hypothetical preferences in a general population. *Health economics*.  
6 2005;14(11):1169-89.
- 7
- 8 30. McDonough CM, Tosteson AN. Measuring preferences for cost-utility analysis.  
9 *Pharmacoeconomics*. 2007;25(2):93-106.
- 10
- 11 31. Senanayake S, Gunawardena N, Palihawadana P, Bandara P, Haniffa R, Karunaratna R, et al.  
12 Symptom burden in chronic kidney disease; a population based cross sectional study. *BMC*  
13 *nephrology*. 2017;18(1):228.
- 14
- 15 32. Dolan P. Modeling valuations for EuroQol health states. *Medical care*. 1997;35(11):1095-108.
- 16
- 17 33. Ramos-Goni JM, Rivero-Arias O. eq5d: A command to calculate index values for the EQ-5D  
18 quality-of-life instrument. *Stata Journal*. 2011;11(1):120.
- 19
- 20 34. Lamers L, Bouwmans C, van Straten A, Donker M, Hakkaart L. Comparison of EQ-5D and  
21 SF-6D utilities in mental health patients. *Health economics*. 2006;15(11):1229-36.
- 22
- 23 35. Harrison M, Davies L, Bansback N, McCoy M, Verstappen S, Watson K, et al. The  
24 comparative responsiveness of the EQ-5D and SF-6D to change in patients with inflammatory  
25 arthritis. *Quality of Life Research*. 2009;18(9):1195.
- 26
- 27 36. Tredoux C, Durrheim K. Numbers, hypotheses and conclusions: A course in statistics for the  
28 social sciences. Cape Town: University of Cape Town Press[Links]. 2002.
- 29
- 30 37. Levey AS, Stevens LA, Coresh J. Conceptual model of CKD: applications and implications.  
31 *American journal of kidney diseases*. 2009;53(3):S4-S16.
- 32
- 33 38. Seliger SL, Zhan M, Walker LD, Fink JC. Chronic kidney disease adversely influences patient  
34 safety. *Journal of the American Society of Nephrology*. 2008;19(12):2414-9.
- 35
- 36 39. Stevens PE, Levin A. Evaluation and management of chronic kidney disease: synopsis of the  
37 kidney disease: improving global outcomes 2012 clinical practice guideline. *Annals of internal*  
38 *medicine*. 2013;158(11):825-30.
- 39
- 40 40. Tseng C-L, Lafrance J-P, Lu S-E, Soroka O, Miller DR, Maney M, et al. Variability in  
41 estimated glomerular filtration rate values is a risk factor in chronic kidney disease progression  
42 among patients with diabetes. *BMC nephrology*. 2015;16(1):34.
- 43
- 44 41. Kularatna S, Byrnes J, Chan YK, Ski CF, Carrington M, Thompson D, et al. Comparison of the  
45 EQ-5D-3L and the SF-6D (SF-12) contemporaneous utility scores in patients with  
46 cardiovascular disease. *Quality of life research : an international journal of quality of life*  
47 *aspects of treatment, care and rehabilitation*. 2017;26(12):3399-408.
- 48
- 49 42. Cohen J. A power primer. *Psychological bulletin*. 1992;112(1):155.
- 50
- 51 43. Litwin MS, Fink A. How to measure survey reliability and validity: Sage; 1995.
- 52
- 53 44. Zhao Fl, Yue M, Yang H, Wang T, Wu Jh, Li SC. Validation and comparison of EuroQol and  
54 short form 6D in chronic prostatitis patients. *Value in Health*. 2010;13(5):649-56.
- 55
- 56
- 57
- 58
- 59
- 60

- 1 45. Cunillera O, Tresserras R, Rajmil L, Vilagut G, Brugulat P, Herdman M, et al. Discriminative  
2 capacity of the EQ-5D, SF-6D, and SF-12 as measures of health status in population health  
3 survey. *Quality of Life Research*. 2010;19(6):853-64.
- 4 46. Bharmal M, Thomas J. Comparing the EQ-5D and the SF-6D descriptive systems to assess  
5 their ceiling effects in the US general population. *Value in Health*. 2006;9(4):262-71.
- 6 47. Janssen M, Pickard AS, Golicki D, Gudex C, Niewada M, Scalone L, et al. Measurement  
7 properties of the EQ-5D-5L compared to the EQ-5D-3L across eight patient groups: a multi-  
8 country study. *Quality of Life Research*. 2013;22(7):1717-27.
- 9 48. de Boer IH, Olan GA, Patel UD. Screening for chronic kidney disease. *Ann Intern Med*.  
10 2013;158(5 Pt 1):362-3.
- 11 49. Hummel A. Chronic renal failure, a frequent and asymptomatic pathology. *Soins; la revue de*  
12 *reference infirmiere*. 2010(745):24-6.
- 13 50. Jesky MD, Dutton M, Dasgupta I, Yadav P, Ng KP, Fenton A, et al. Health-related quality of  
14 life impacts mortality but not progression to end-stage renal disease in pre-dialysis chronic  
15 kidney disease: a prospective observational study. *PloS one*. 2016;11(11):e0165675.
- 16  
17  
18  
19  
20  
21  
22  
23  
24  
25  
26  
27  
28  
29  
30  
31  
32  
33  
34  
35  
36  
37  
38  
39  
40  
41  
42  
43  
44  
45  
46  
47  
48  
49  
50  
51  
52  
53  
54  
55  
56  
57  
58  
59  
60

**Table 1 : Demographic distribution of the sample by the EQ-5D-3L and the SF-6D utility scores**

# p value significant&lt;0.05, paired t test

| Variable            | N (%)      | EQ-5D-3L utility mean (SD) | Sf-6D utility mean (SD) | p value <sup>#</sup> |
|---------------------|------------|----------------------------|-------------------------|----------------------|
| All sample          | 1096       | 0.540 (0.35)               | 0.534 (0.09)            | 0.588                |
| Sex                 |            |                            |                         |                      |
| Male                | 686 (62.6) | 0.561 (0.34)               | 0.532 (0.10)            | 0.016                |
| Female              | 410 (37.4) | 0.505 (0.37)               | 0.539 (0.09)            | 0.045                |
| Age (years)         |            |                            |                         |                      |
| Less than 20        | 07 (0.6)   | 0.570 (0.44)               | 0.455 (0.09)            | 0.486                |
| 20-40               | 45 (4.1)   | 0.591 (0.34)               | 0.536 (0.09)            | 0.259                |
| 41-60               | 562 (51.3) | 0.555 (0.35)               | 0.540 (0.10)            | 0.282                |
| More than 60        | 482 (44.0) | 0.517 (0.35)               | 0.529 (0.08)            | 0.440                |
| Education status    |            |                            |                         |                      |
| No formal education | 81 (7.4)   | 0.448 (0.42)               | 0.508 (0.09)            | 0.154                |
| 5 Grade             | 413 (37.7) | 0.529 (0.35)               | 0.536 (0.09)            | 0.681                |
| 6-11 Grade          | 377 (34.4) | 0.556 (0.34)               | 0.533 (0.10)            | 0.159                |
| GCE O/L passed      | 190 (17.3) | 0.554 (0.34)               | 0.540 (0.09)            | 0.513                |
| GCE A/L passed      | 35 (3.2)   | 0.618 (0.34)               | 0.540 (0.09)            | 0.267                |
| Employment status   |            |                            |                         |                      |
| Employed            | 380 (34.7) | 0.675 (0.25)               | 0.547 (0.10)            | <0.001               |
| Not employed        | 716 (65.3) | 0.468 (0.37)               | 0.528 (0.09)            | <0.001               |
| Comorbidities       |            |                            |                         |                      |
| Present             | 778 (71.0) | 0.505 (0.36)               | 0.532 (0.09)            | 0.028                |
| Absent              | 318 (29.0) | 0.625 (0.29)               | 0.542 (0.10)            | <0.001               |
| CKD stage           |            |                            |                         |                      |
| Early stage         | 254 (24.0) | 0.588 (0.30)               | 0.551 (0.10)            | 0.042                |
| Stage IV            | 614 (58.1) | 0.566 (0.42)               | 0.536 (0.09)            | 0.015                |
| Stage V             | 151 (14.3) | 0.467 (0.42)               | 0.523 (0.08)            | 0.076                |
| Dialysis            | 38 (3.6)   | 0.126 (0.39)               | 0.432 (0.07)            | <0.001               |

**Table 2 : Distribution of the sample by the EQ-5D-3L dimensions**

|                 | Mobility (%) | Self-care (%) | Usual activities (%) | Pain/discomfort (%) | Anxiety/depression (%) |
|-----------------|--------------|---------------|----------------------|---------------------|------------------------|
| No problem      | 515 (47.0)   | 644 (58.8)    | 473 (43.2)           | 182 (16.6)          | 261 (23.8)             |
| Some problem    | 559 (51.0)   | 421 (38.4)    | 587 (53.6)           | 739 (67.4)          | 680 (62.0)             |
| Extreme problem | 22 (2.0)     | 31 (2.8)      | 36 (3.3)             | 175 (16.0)          | 155 (14.1)             |

**Table 3 : Distribution of the sample by the SF-6D dimensions**

|                | Physical functioning (%) | Role limitation (%) | Social functioning (%) | Pain (%)   | Mental health (%) | Vitality (%) |
|----------------|--------------------------|---------------------|------------------------|------------|-------------------|--------------|
| 1 <sup>a</sup> | 8 (0.7)                  | 173 (15.8)          | 17 (1.6)               | 7 (0.6)    | 6 (0.6)           | 2 (0.2)      |
| 2              | 22 (2.0)                 | 5 (0.5)             | 60 (5.5)               | 5 (0.5)    | 130 (11.9)        | 194 (17.7)   |
| 3              | 304 (27.7)               | 135 (12.3)          | 482 (44.0)             | 59 (5.4)   | 582 (53.1)        | 498 (45.4)   |
| 4              | 356 (32.5)               | 783 (71.4)          | 481 (43.9)             | 452 (41.2) | 364 (33.2)        | 287 (26.2)   |
| 5              | 87 (7.9)                 | NA                  | 56(5.1)                | 333 (30.4) | 14 (1.3)          | 115 (10.5)   |
| 6 <sup>b</sup> | 319 (29.1)               | NA                  | NA                     | 240 (21.9) | NA                | NA           |

<sup>a</sup> No problems<sup>b</sup> Severe problems**Table 4 : Correlation between the EQ-5D-3L and the SF-6D**

|                      | Mobility       | Self-care      | Usual activities | Pain/discomfort | Anxiety/depression |
|----------------------|----------------|----------------|------------------|-----------------|--------------------|
| Physical functioning | <b>0.3249*</b> | <b>0.2644*</b> | 0.2347*          | 0.3123*         | 0.2988*            |
| Role limitation      | 0.0145         | -0.0021        | <b>0.2615*</b>   | 0.0099          | 0.0875*            |
| Social functioning   | 0.3672*        | 0.2811*        | <b>0.3152*</b>   | 0.4090*         | 0.3656*            |
| Pain                 | 0.3607*        | 0.2258*        | 0.2459*          | <b>0.3567*</b>  | 0.3495*            |
| Mental health        | 0.1770*        | 0.1975*        | 0.1771*          | 0.1387*         | <b>0.1401*</b>     |
| Vitality             | 0.2242*        | 0.0889*        | 0.1629*          | 0.3420*         | 0.3136*            |

**Table 5 : Discrimination across clinical severity groups**

| CKD stage   | EQ-5D-3L   |              |        |       | SF-6D      |              |        |       |
|-------------|------------|--------------|--------|-------|------------|--------------|--------|-------|
|             | N          | Mean (SD)    | Median | ES    | N          | Mean (SD)    | Median | ES    |
| Early stage | 254 (24.0) | 0.588 (0.30) | 0.656  |       | 254 (24.0) | 0.551 (0.10) | 0.570  |       |
| IV          | 614 (58.1) | 0.566 (0.42) | 0.620  | 0.071 | 614 (58.1) | 0.536 (0.09) | 0.560  | 0.141 |
| V           | 151 (14.3) | 0.467 (0.42) | 0.585  | 0.305 | 151 (14.3) | 0.523 (0.08) | 0.550  | 0.138 |
| Dialysis    | 38 (3.6)   | 0.126 (0.39) | -0.016 | 0.807 | 38 (3.6)   | 0.432 (0.07) | 0.410  | 1.098 |

Between CKD stage utility differences are significant (<0.001) within EQ-5D-3L and SF-6D (ANOVA; P<0.05)

1  
2  
3  
4  
5  
6  
7  
8  
9  
10  
11  
12  
13  
14  
15  
16  
17  
18  
19  
20  
21  
22  
23  
24  
25  
26  
27  
28  
29  
30  
31  
32  
33  
34  
35  
36  
37  
38  
39  
40  
41  
42  
43  
44  
45  
46  
47  
48  
49  
50  
51  
52  
53  
54  
55  
56  
57  
58  
59  
60

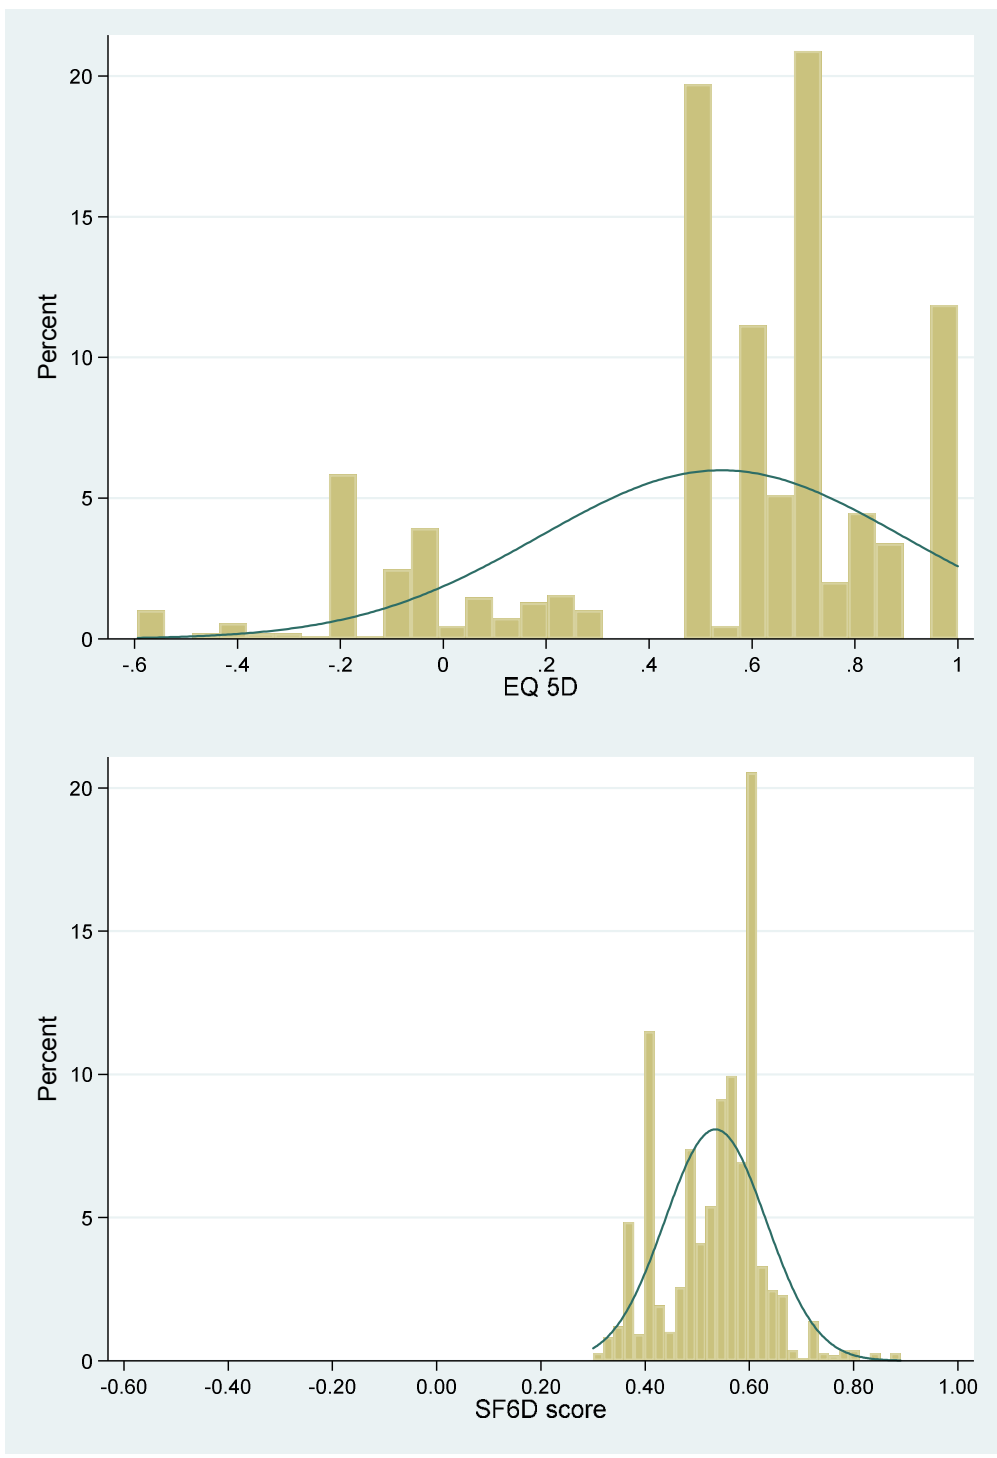

Fig. 1. Distribution of EQ-5D (A) and SF-6D (B)

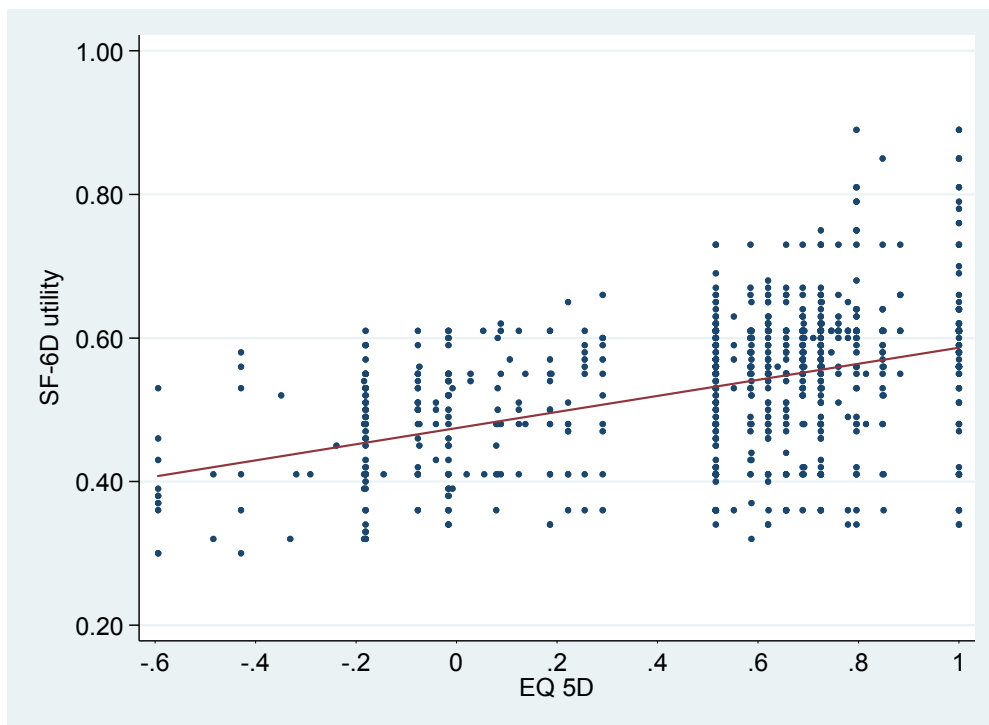

Fig. 2 Correlation between the EQ-5D-3L and the SF-6D utilities

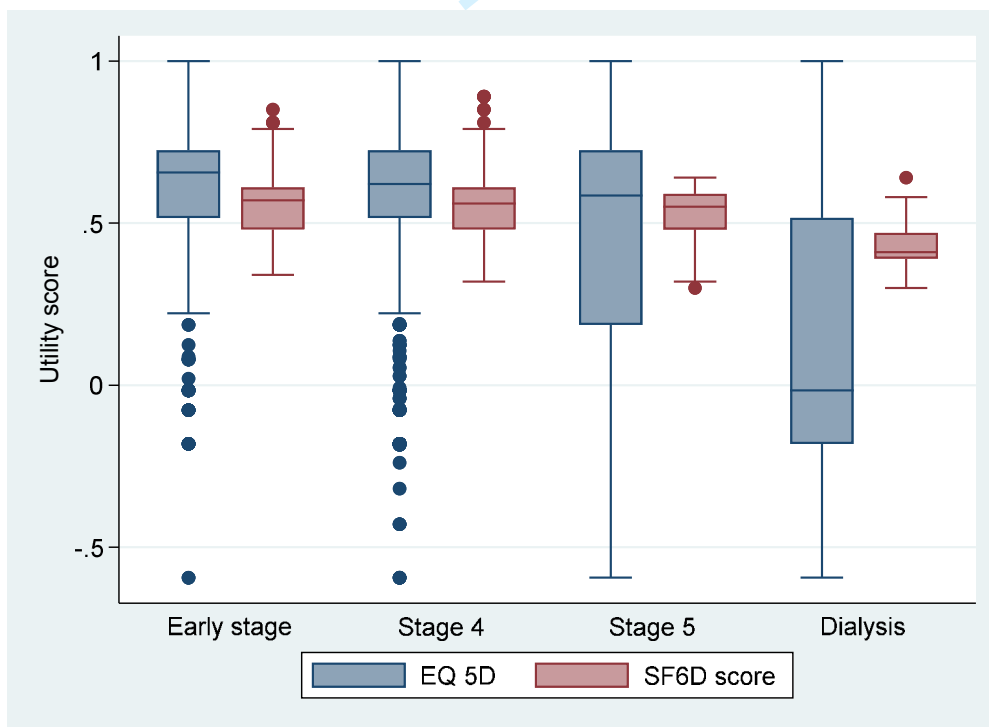

Fig 3: The box-plots present the median, quartiles and extreme values for the EQ-5D and SF-6D utility scores for CKD stage

# BMJ Open

## Comparison of the EQ-5D-3L and the SF-6D (SF-36) contemporaneous utility scores in patients with Chronic Kidney Disease in Sri Lanka; a cross sectional survey

|                                 |                                                                                                                                                                                                                                                                                                                                                                                       |
|---------------------------------|---------------------------------------------------------------------------------------------------------------------------------------------------------------------------------------------------------------------------------------------------------------------------------------------------------------------------------------------------------------------------------------|
| Journal:                        | <i>BMJ Open</i>                                                                                                                                                                                                                                                                                                                                                                       |
| Manuscript ID                   | bmjopen-2018-024854.R1                                                                                                                                                                                                                                                                                                                                                                |
| Article Type:                   | Research                                                                                                                                                                                                                                                                                                                                                                              |
| Date Submitted by the Author:   | 22-Sep-2018                                                                                                                                                                                                                                                                                                                                                                           |
| Complete List of Authors:       | Kularatna, Sanjeewa; Australian Centre For Health Services Innovation, Queensland University of Technology<br>Senanayake, Sameera; Australian Centre For Health Services Innovation, Queensland University of Technology<br>Gunawardena, Nalika; World Health Organization<br>Graves, Nicholas; Australian Centre For Health Services Innovation, Queensland University of Technology |
| <b>Primary Subject Heading</b>: | Health services research                                                                                                                                                                                                                                                                                                                                                              |
| Secondary Subject Heading:      | Health economics, Health services research, Renal medicine                                                                                                                                                                                                                                                                                                                            |
| Keywords:                       | Cost utility analysis, Quality-Adjusted Life Years (QALYs), utility, Chronic Kidney Disease (CKD)                                                                                                                                                                                                                                                                                     |
|                                 |                                                                                                                                                                                                                                                                                                                                                                                       |

SCHOLARONE™  
Manuscripts

1  
2  
3  
4  
5  
6  
7  
8  
9  
10  
11  
12  
13  
14  
15  
16  
17  
18  
19  
20  
21  
22  
23  
24  
25  
26  
27  
28  
29  
30  
31  
32  
33  
34  
35  
36  
37  
38  
39  
40  
41  
42  
43  
44  
45  
46  
47  
48  
49  
50  
51  
52  
53  
54  
55  
56  
57  
58  
59  
60

**1 Comparison of the EQ-5D-3L and the SF-6D (SF-36) contemporaneous utility scores in  
2 patients with Chronic Kidney Disease in Sri Lanka; a cross sectional survey**

3  
4  
5 Sanjeewa Kularatna<sup>1</sup>, Sameera Senanayake<sup>1</sup>, Nalika Gunawardena<sup>2</sup>, Nicholas Graves<sup>1</sup>

6  
7 <sup>1</sup>Australian Centre for Health Services Innovation, Queensland University of Technology

8 <sup>2</sup> World Health Organization, Sri Lanka

9  
10 **Corresponding author;**

11 Sanjeewa Kularatna - *sanjeewa.kularatna@qut.edu.au*

12  
13 **Word count : 3277**





1  
2  
3  
4  
5  
6  
7  
8  
9  
10  
11  
12  
13  
14  
15  
16  
17  
18  
19  
20  
21  
22  
23  
24  
25  
26  
27  
28  
29  
30  
31  
32  
33  
34  
35  
36  
37  
38  
39  
40  
41  
42  
43  
44  
45  
46  
47  
48  
49  
50  
51  
52  
53  
54  
55  
56  
57  
58  
59  
60  
61  
62  
63  
64  
65  
66

**Strengths and limitations of this study**

- The response rate of the study is very high.
- Both tools used in the study (EQ 5D 3L and SF 36) have been previously validated to the Sri Lankan setting before.
- Data collectors were experienced for many local and international studies done among CKD patients in Sri Lanka and further they were trained by the principal investigator to ensure the quality of the data collected.
- Our study was a cross-sectional study, thus we could not assess how utility scores of the two instruments change over time.
- Some of the information related to QOL in SF-36 is considered to be sensitive in nature and the fact that this information was obtained utilising an interviewer-administered questionnaire could have led to some under-reporting in the assessment of QOL though many measures were taken to minimize this issue.

## 67 **Introduction**

68 Chronic kidney disease (CKD) is a substantial public health problem with adverse  
69 psychological, physical and economic outcomes. The burden of CKD is increasing  
70 globally(1). World Health Report (2002) and Global Burden of Disease (GBD) project stated  
71 that the diseases of the kidney contribute much to the global disease burden with  
72 approximately 850,000 deaths every year globally (2). Furthermore, according to GBD study  
73 conducted in 2010, of the top causes of DALY, CKD is ranked 29<sup>th</sup> globally, 23<sup>rd</sup> in South  
74 East Asia and 14<sup>th</sup> in Sri Lanka (3). Due to the progressive and disabling nature of CKD, it  
75 poses a substantial impact on the quality of life (QOL) of individuals. It is important to  
76 measure QOL indicators for the management of chronic kidney disease patients. Several  
77 studies have demonstrated a relationship between reduced QOL and increased morbidity and  
78 mortality (4-7).

79  
80 World over, the importance of including QOL indicators in the clinical management of  
81 patients has been highlighted. This has come to the limelight after several studies  
82 demonstrated the strong relationship between reduced QOL and increased morbidity and  
83 mortality (5, 8). Meantime, economic evaluation has become increasingly popular among  
84 researchers and policy makers during resource allocation in recent years. Due to the  
85 relationship between QOL and clinical outcome, during the recent years, QOL has become an  
86 important health outcome in economic evaluations. In cost utility analysis (CUA), a method  
87 of economic evaluation, outcomes are usually measured in Quality-Adjusted Life Years  
88 (QALYs), which is a measure of QOL.

89  
90 The concept of QALYs was developed in the 1970s. It can measure the changes of an  
91 individual's quality and quantity of life and can also aggregate these improvements across  
92 individual (9, 10). The change in the quality of life in QALY is measured using a set of  
93 weights, called utilities, which reflect different health states. For all possible health states,  
94 utilities should be measured on a scale where 1 refers to best imaginable health and 0 refers  
95 to death (11). Measuring utilities for different health states is complex and time-consuming.  
96 Thus, Multi Attribute Utility Instruments (MAUI) such as EuroQol-5D (EQ-5D-3L) (12),  
97 Short Form-6D (SF-6D) (13) or the Health Utility Index (HUI) (14, 15) are used to define  
98 different health states. The utility scores for different health states in different instruments are  
99 derived from methods such as Standard Gambling method (16), Discrete Choice Experiments  
100 (17) and Time Trade-Off experiments (18). EQ-5D-3L is the most widely used utility  
101 instrument at present (19). EQ-5D-5L, which is the newer version of EQ-5D, has also been  
102 developed and tested recently (20).

1 103  
2  
3 104 Since all the MAUIs aim at measuring the health state of individuals, all the instruments  
4 105 should generate the same utility value for a particular state of health. However, the evidence  
5 106 indicates that there is an essential difference in the utility scores for a particular health state  
6 107 between different instruments (19, 21-29). This, in turn, indicates that the choice of the  
7 108 MAUI used may adversely influence the results of CUA and thereby the decision-making  
8 109 process (30). Furthermore, for incremental analyses, use of different MAUIs may lead to  
9 110 different results regarding the magnitude, direction or significance of any change in health-  
10 111 related quality of life measure.  
11  
12  
13  
14  
15  
16

17 112  
18 113 Though the differences between MAUIs have been evaluated in many disease conditions (19,  
19 114 21, 22, 24), there are no evidence in the literature comparing MAUIs using patients with  
20 115 CKD. The aim of our study is to compare contemporaneous EQ-5D-3L and SF-6D utility  
21 116 scores in patients with CKD. Results may be useful for researchers selecting a generic MAUI  
22 117 to estimate utilities for use in economic modelling of treatments for CKD.  
23  
24  
25  
26

27 118

## 27 119 **Methods**

### 28 120 *Participant selection*

29 121 A population-based descriptive cross-sectional study was conducted in the district of  
30 122 Anuradhapura in the North Central Province (NCP) of Sri Lanka between Septembers to  
31 123 December 2015. The study population consisted of 1162 confirmed CKD patients, calculated  
32 124 using the appropriate formula (31), who were over 18 years old with documented evidence of  
33 125 CKD living in the Anuradhapura district. The diagnosis of CKD was made if the Glomerular  
34 126 Filtration Rate (GFR) was less than 60 ml/min per 1.73m<sup>2</sup> of body surface area in two  
35 127 measurements made three months apart.  
36  
37  
38  
39  
40  
41

42 128

43 129 The inclusion criteria were patients above 18 years of age and those who were diagnosed as  
44 130 having CKD by a specialist nephrologist or a consultant physician. Presence of evidence of  
45 131 such diagnosis was made by way of diagnosis cards, clinic records or any other record issued  
46 132 by a specialist nephrologist, a consultant physician or a government hospital. Patients who  
47 133 had previous renal transplantation, who were unable to provide rational information due to  
48 134 any cause (e.g. mental retardation) and who were critically ill were excluded from the study.  
49  
50  
51  
52

53 135

54 136 The study instrument was an interviewer-administered questionnaire to gather information on the  
55 137 socio-demographic information, CKD related information, EQ-5D-3L and SF 36.  
56  
57

58 138

1 139 Five Public Health Inspectors working in the CKD unit in the North Central Province were used  
2 140 for the data collection and all have been working in the unit for more than 5 years and they had  
3 141 experience in functioning as data collectors for many local and international studies done among  
4 142 CKD patients in the NCP. Data collection was mostly done on weekdays considering the fact  
5 143 that most of the study units were expected to be at home, since most are employed in the informal  
6 144 sector. The data collectors assessed the eligibility of patients by reviewing their clinical  
7 145 records. Informed consent was obtained from those who were eligible for participation in the  
8 146 study.

9 147  
10 148 The study was conducted in all nineteen Medical Officer of Health (MOH) areas of the  
11 149 Anuradhapura district. The number of participants to be included from each MOH area was  
12 150 based on probability proportionate to the size of CKD patients registered in each of the MOH  
13 151 areas. The required number of participants from each MOH area was selected using simple  
14 152 random sampling method. The population-based CKD register – which records the patients  
15 153 with a confirmed diagnosis of CKD from renal clinics in hospitals of the NCP since 2003 –  
16 154 was used as the sampling frame. The register was obtained from the office of the Provincial  
17 155 Director of Health Services (32).

18 156

### 19 157 ***Calculation of utility scores***

20 158 Currently, there is no algorithm based on preferences of the Sri Lankan public to score the  
21 159 SF-6D on a utility scale. Therefore, the UK algorithm was used for this purpose (13).

22 160 Though Sri Lankan EQ-5D-3L utility scores are available (18), the UK utility scores were  
23 161 used for the EQ-5D-3L (33) because of the unavailability of comparable Sri Lankan SF-6D  
24 162 utility scores as mentioned earlier. This allowed the comparison of utility scores from the  
25 163 same country.

26 164

27 165 The EQ-5D-3L instrument contains five domains; mobility, self-care, usual activities, pain /  
28 166 discomfort and anxiety / depression. Each domain has one item and each item has three  
29 167 levels: one denoting no problems and three denoting severe problems (12). Thus, EQ-5D-3L  
30 168 has mutually exclusive 243 different health states.

31 169

32 170 SF-6D is derived from SF-36, SF-12 Version 1 and SF-12 Version 2. The current study  
33 171 utilised SF-36 for the data collection. SF-36 includes 36 items that measure eight domains;  
34 172 role limitations caused by physical problems (4 items), physical function (10 items), role  
35 173 limitations caused by emotional problems (3 items), pain (2 items), social function (2 items),  
36 174 general health perceptions (5 items), emotional well-being (5 items) and energy / fatigue (4

175 items). Questions have different answer options which range from two to six. While scoring,  
176 each question is scored in a scale ranging from 0 (worst health) to 100 (best health). All items  
177 in a domain are summed up and averaged to give an average score for each domain which  
178 ranges from 0 (worst health) to 100 (best health). To calculate the utility scores of the SF-6D,  
179 11 items are used covering six domains; physical functioning, role limitation, social  
180 functioning, pain, mental health and vitality (13).

181

182 The EQ-5D-3L utility calculation was undertaken using the STATA syntax developed by  
183 Ramos-Goni et al. (34). The SF-6D scores were computed based on published algorithms  
184 (13). Patients for whom one of the two measurements was missing were excluded from the  
185 analysis.

186

187 The EQ-5D utility scores range from -0.59, 0=being dead; negative values represent health  
188 status considered worse than “dead”, to 1.00 which indicate best imaginable health. The SF-  
189 6D utility scores ranged from 0.296 which indicate severely impaired levels in all dimensions  
190 to 1.0 which indicates no difficulty in any dimensions.

191

### 192 ***Data analysis***

193 STATA 15.1 software was used for the analysis. Distribution of the socio-demographic  
194 characteristics of the study population was compared with their mean utility scores.  
195 Normality of the two distributions were assessed using Kolmogorov-Smirnov and Shapiro-  
196 Wilk tests. Wilcoxon signed-rank test was used to assess the difference between the two  
197 instruments in each socio-demographic class (35). Histograms were plotted for the two  
198 utility values distribution. Floor effects and ceiling (proportion of patients with the highest  
199 and lowest possible scores respectively) were calculated for the EQ-5D and SF-6D. Ceiling  
200 and floor effects were considered small if  $\leq 15\%$  of patients occupy the best or worst health  
201 states, but they were considered serious if  $> 15\%$  of patients occupy these states (36).

202

203 Currently, an established methodology to compare different MAUIs is not available. Thus,  
204 recently published methodologies, which compared different MAUIs, were followed in the  
205 current study (19, 23, 35). This included a combination of statistical and psychometric  
206 analyses to examine discrimination, agreement, differences and correlation between the two  
207 instruments.

208

### 209 ***Agreement and differences***

1 210 The Wilcoxon Signed-Ranks Test was used to assess the overall difference between the EQ-5D-  
2 211 3L and SF-6D utility scores and the difference of the utility scores according to different  
3 212 socio-demographic and disease related features. Furthermore, the distribution of the  
4 213 responses to the different domains of the two instruments was tabulated to present the  
5 214 agreement and the differences between the two instruments. Bland-Altman plot was also  
6 215 used to assess the proportional error and the limit of agreement (37).  
7  
8  
9  
10

11 216

### 12 217 ***Intra Class Correlation (ICC)***

13 218 The dimensions of the two instruments were compared using ICC. The related dimensions  
14 219 between the two MAUIs are role limitation (SF-6D)/usual activities (EQ-5D-3L), physical  
15 220 functioning (SF-6D)/mobility and self-care (EQ-5D-3L), pain (SF-6D)/pain and discomfort  
16 221 (EQ-5D-3L), social functioning (SF-6D)/usual activities (EQ-5D-3L) and mental health (SF-  
17 222 6D)/anxiety and depression (EQ-5D-3L). The vitality dimension of the SF-6D did not have  
18 223 any related dimension with the EQ-5D-3L. The magnitude of the correlation coefficients  
19 224 were interpreted according to Guilford's criteria (38).  
20  
21  
22  
23  
24  
25

26 225

### 27 226 ***Discrimination***

28 227 It is important that MAUIs can discriminate correctly among groups of different severity as  
29 228 MAUIs are meant to measure change in QOL due to health improvement in the condition of  
30 229 interest.  
31  
32  
33

34 230

35 231 Glomerular Filtration Rate (GFR) is the most important indicator of kidney function of  
36 232 patients with CKD (39). Studies have shown that decreased GFR is associated with infection,  
37 233 impaired cognitive and physical function as well as threats to patient safety (40). Though  
38 234 classifications exist to classify stages of CKD, it is evident that at present most of the clinical  
39 235 decision making in CKD is solely based on GFR base classification (41, 42). Depending on  
40 236 the GFR value, CKD is categorised into five stages; stage I to stage V. For analytical  
41 237 purposes, the CKD stages I to III were categorised as "early stage" in the present study. It is  
42 238 expected that with advanced stages of the disease, the utility scores should be lower than the  
43 239 early stages.  
44  
45  
46  
47  
48  
49

50 240

51 241 Discrimination of EQ-5D-3L and SF-6D for different CKD stages was examined using the  
52 242 non-parametric test, Kruskal–Wallis, and effect size. The instrument's ability to discriminate  
53 243 between two adjacent stages was estimated by calculating the effect size. The effect size was  
54 244 calculated by dividing the mean difference of two adjacent CKD stages by the standard  
55 245 deviation of the milder of the two CKD stages (23, 43). Large effect size indicates better  
56  
57  
58  
59  
60



1 246 discriminating ability of the instrument. The effect size was categorised into small (0.2–0.5),  
2 247 medium (0.5–0.8) and large (more than 0.8) (44).

3 248

#### 4 249 ***Test-retest reliability***

5 250 To assess the test-retest reliability of the study instrument, within a period of one week, 30  
6 251 randomly selected study participants were visited at their households by the data collectors.  
7 252 Test re-test reliability of the utility scores of the two instruments was assessed using ICC and  
8 253 a value of 0.70 or greater was considered as satisfactory reliability (45).

9 254

#### 10 255 ***Patient and Public Involvement***

11 256 The main stakeholders in the provision of care for the CKD patients such as consultants,  
12 257 medical officers working in nephrology units, community leaders and the patients living in  
13 258 this area were involved in planning the study. Their concerns were always entertained and  
14 259 where feasible their concerns were incorporated into the study. During the data collection,  
15 260 stage permission was obtained from the respective local officers. The results of the study was  
16 261 communicated to the local level officials such as Medical Officer of Health, Divisional  
17 262 Secretariat, Regional Director of Health Services and Provincial Director of Health Services.

18 263

#### 19 264 **Results**

##### 20 265 ***Sample characteristics***

21 266 Out of 1162 participants selected to be included in the study, 66 (5.6%) did not participate in  
22 267 the study giving a response rate of 94.4%. The mean age of the study population was 58.4  
23 268 years (Standard Deviation (SD) 10.8). There was a preponderance of males among the study  
24 269 population (62.6%, N=686). The mean eGFR of the population was 31.8 (SD 20.2)  
25 270 ml/min/1.73 m<sup>2</sup>. The mean number of years since diagnosed with CKD was found to be 4.1  
26 271 (SD 3.2) years. The majority of participants was in the later stages, stage 4 or beyond, of  
27 272 CKD (n=803; 73.2%). 38 participants (3.6%), with stage 5 of the disease and undergoing  
28 273 dialysis, were on haemodialysis (Table 1). Chronic Kidney Disease of Unknown origin  
29 274 (CKDu) was the cause of the CKD in most of the study population (n=489; 43.7%).

30 275

##### 31 276 ***Distribution of EQ-5D-3L and SF-6D utility scores***

32 277 The mean EQ-5D-3L utility score at baseline was 0.540 compared with 0.534 for the SF-6D  
33 278 as summarised in Table 1. The EQ-5D-3L utility score ranged from -0.594 to 1, while SF-6D  
34 279 ranged from 0.3 to 0.89. The median baseline values have different locations in their  
35 280 respective scoring ranges (Fig 1). The EQ-5D-3L showed 1.0% floor effect and 11.8% ceiling  
36 281 effect, while SF-6D had 0.0% floor and ceiling effects.

37 282



### 283 **Agreement, differences and correlation between the two utility scores**

284 Analyses revealed non- normal distribution of the utility scores of both the instruments, thus  
285 Wilcoxon Signed-Ranks test was used to compare the two utility scores. There was  
286 significant difference ( $p < 0.001$ ) between overall scores of the two utility instruments.  
287 Further the two utility scores were significantly different among males ( $< 0.001$ ), age more  
288 than 40 years groups, those who were educated from grade 5 to General Certificate of  
289 Education (GCE) - Ordinary Level, those who were employed, among both who had and  
290 didn't have comorbidities, those who didn't have comorbidities, up to stage IV of CKD and  
291 among dialysis patients (Table 1). The standard deviation of the EQ-5D-3L was considerably  
292 larger than that of the SF-6D among all sub groups.

293  
294 Significant proportion of the patients reported “no problem” in any of the EQ-5D-3L  
295 dimensions than the SF-6D. However, fewer patients reported “extreme problems” in the EQ-  
296 5D-3L than in the SF-6D (Tables 2 and 3). Patients reported different results for the related  
297 dimensions of the two MAUIs (Tables 2 and 3). Nearly half of the patients reported “no  
298 problem” in Mobility domain of the EQ-5D-3L, while only 0.7% reported “no problems”  
299 with the physical functioning of the SF-6D. Nearly quarter (23.8%) of patients reported “no  
300 problems” for the anxiety / depression dimension in the EQ-5D-3L, whereas only 0.6%  
301 reported the same for the mental health dimension of the SF-6D.

302  
303 The correlation between EQ-5D-3L and SF-6D was 0.408, which was statistically significant  
304 at  $p < 0.001$  level (Figure 2). Regarding the ICC between different domains of the two  
305 instruments, according to the Guilford's criteria, low level of correlation (0.2-0.4) was seen  
306 between Mobility and Physical functioning (0.381), Mobility and Mental health (0.293),  
307 Mobility and Vitality (0.322), Self-care and Physical functioning (0.326), Self-care and Pain  
308 (0.330), Self-care and Mental Health (0.323), Usual activities and Physical functioning  
309 (0.296), Usual activities and Pain (0.355), Usual activities and Mental health (0.295), Pain/  
310 discomfort and Physical functioning (0.382), Pain/ discomfort and Mental health (0.240),  
311 Anxiety/ depression and Physical functioning (0.381). Also, moderate correlation (0.4-0.6)  
312 was evident between Social functioning and Mobility (0.517), Social functioning and Self-  
313 care (0.424), Social functioning and Usual activities (0.464), Social functioning and  
314 Pain/discomfort (0.566), Social functioning and Anxiety/depression (0.528), Pain and  
315 Mobility (0.475), Pain and Pain/ discomfort (0.482), Pain and Anxiety/depression (0.484),  
316 Vitality and Pain/ discomfort (0.475) and Vitality and Anxiety/depression (0.453). All other  
317 domains were poorly correlated between the two instruments (Table 4). The Bland-Altman  
318 plot showed proportional error and wide limits of agreement (Figure 3).

319

**320 Discrimination**

321 With both MAUIs, utility scores decreased with increasing severity (as measured by CKD  
322 stage) (Table 5). In both MAUIs, the utility differences across CKD stages were statistically  
323 significant ( $p < 0.05$ ) indicating good discrimination. Figure 3 indicated the box-plots present  
324 the median, quartiles and extreme values for the EQ-5D and SF-6D utility scores for CKD  
325 stage. Furthermore, the calculated effect size between CKD early stage and stage IV was  
326 0.071 and 0.141 for EQ-5D-3L and SF-6D respectively. The highest effect size was observed  
327 between CKD stage V and dialysis group, which was 0.807 for EQ-5D-3L and 1.098 for SF-  
328 6D.

329

**330 Test-retest reliability**

331 The test re-test ICC was more than 0.943 in EQ-5D-3L while it was 0.921 in SF 6D,  
332 indicating good test re-test reliability in both the instruments.

333

**334 Discussion**

335 This is the first study to compare the utility scores arising from the EQ-5D-3L and SF-6D in  
336 CKD patients. According to the current study, the correlation between the scores was  
337 moderate. Both tools were able to discriminate advancement of CKD stages. Effect size,  
338 which denoted the discriminating ability of different CKD stages, is highest when disease  
339 condition is advanced and the highest effect size was seen in SF-6D. Further, the lowest  
340 ceiling effect and the floor effect were seen in SF 6D.

341

342 Evidence indicate that the choice of MAUI (e.g.; EQ 5D or SF6D) has an impact on the  
343 results of the cost-utility analysis (46, 47). Sack et al. (2009) compared the results of cost-  
344 utility estimates using both EQ 5D and SF 6D. Results indicated contrasting results for the  
345 two instruments and authors concluded that the choice of the instrument does matter in cost-  
346 utility analysis (46). Thus, from an economic perspective it is important to know the most  
347 suitable MAUI to be used among CKD patients.

348

349 At present, there is no consensus on the methodology to compare the utility scores of  
350 different MAUIs (19, 35). The present study adopted the methodologies used by Kularatna et  
351 at. (2017) and Lamers et al. (2006) (19, 35). Only one time assessment of the utilities was  
352 done in the present study. Thus, the responsiveness of the two instruments was not assessed.  
353 Though Sri Lankan EQ-5D-3L utility scores are available (18), yet we used the UK utility  
354 scores for the EQ-5D-3L (33) because of the unavailability of comparable Sri Lankan SF-6D

1 355 utility scores. This is an accepted method of calculating the utility scores in the absence of  
2 356 country specific utilities. Two studies conducted in Netherlands (24) and Italy (21),  
3 357 comparing the utility scores of the two instruments, had used the UK derived EQ-5D-3L and  
4 358 SF-6D utility scores.  
5  
6

7 359  
8  
9 360 The present study did not find any difference ( $p=0.588$ ) between the overall mean scores of  
10 361 the two utility instruments. This was similar to a study conducted among a group of  
11 362 HIV/AIDS patients (28), but different from other studies available in the literature where  
12 363 different results have been reported. Significantly higher utility values for EQ-5D-3L were  
13 364 found among general population (29, 48), cardio-vascular disease patients (19), rheumatoid  
14 365 arthritis patients (21) and patients with stable angina (16). However, in a study conducted  
15 366 among a group of patients with psychiatric disorders, significantly higher utility values were  
16 367 obtained for SF-6D instrument (24). These varying results could be due to different recall  
17 368 periods of the two instruments. EQ-5D-3L assessed the health status of the day of instrument  
18 369 administration while SF-6D, which was derived from SF-36, assessed the health status of the  
19 370 past 30 days.  
20  
21  
22  
23  
24  
25  
26

27 371  
28 372 Though overall ceiling and floor effects of both instruments were small, relatively higher  
29 373 ceiling effect was evident in the EQ-5D-3L. This was consistent with several other studies  
30 374 conducted elsewhere, where EQ 5D 3L reported a relatively higher ceiling effect compared to  
31 375 SF 6D (16, 19, 49-51). This is mainly due to the fact that the EQ-5D-3L has limited response  
32 376 levels and the five level newer version of EQ-5D expected to improve the properties of the  
33 377 three-level in terms of reduced ceiling effects, increased reliability and improved ability to  
34 378 discriminate between different levels of health (52). Further, the current study reported  
35 379 relatively lower ceiling effect, for the EQ 5D, compared to results obtained among  
36 380 Parkinson's disease (13.5%) and stable angina (15.5%) patients. However, our result was  
37 381 higher compared to the ceiling effect observed among patients with systemic sclerosis  
38 382 (7.0%). Among many other factors that could contribute to these differences, the level of  
39 383 morbidity of a disease is said to be one of the factors which could influence the ceiling effect  
40 384 observed in EQ 5D (53). Thus the diseases with lower morbidity are expected to have higher  
41 385 ceiling effects.  
42  
43  
44  
45  
46  
47  
48  
49  
50

51 386  
52  
53 387 Discrimination of EQ-5D-3L and SF-6D for different CKD stages was examined using  
54 388 ANOVA and effect size. In both MAUIs, the utility differences across CKD stages were  
55 389 statistically significant ( $p<0.05$ ; ANOVA) indicating good discrimination. However, the  
56 390 effect size was small for both the tools until the dialysis stage. At the dialysis stage, the effect  
57  
58  
59  
60

1 391 size is large and this was highest in the SF-6D instrument. It could be because CKD is  
2 392 considered asymptomatic until the later stages of the disease (54, 55), not allowing the  
3 393 instruments to discriminate the different stages. According to a recent study conducted by  
4 394 Jesky et al. (2016), the EQ-5D-3L utility scores of the adjacent pre-dialysis CKD stages were  
5 395 not found to be statistically significant (56).  
6  
7  
8

9 396

### 10 397 **Limitations**

11 398 Some of the information related to QOL in SF-36 is considered to be sensitive in nature and  
12 399 the fact that this information was obtained utilising an interviewer-administered questionnaire  
13 400 could have led to some under-reporting in the assessment of QOL though many measures  
14 401 were taken to minimize this issue. Our study was a cross-sectional study, thus we could not  
15 402 assess how utility scores of the two instruments change over time.  
16  
17  
18  
19

20 403

### 21 404 **Conclusions**

22 405 The correlation between the scores was moderate. Both tools were able to discriminate  
23 406 advancement of CKD stages. Effect size, which denoted the discriminating ability of the  
24 407 different CKD stages, is highest when disease condition is advanced and the highest effect  
25 408 size was seen in SF-6D. Findings indicate that both tools cover different aspects of health.  
26 409 Thus, although there was a moderate correlation between the measures, both scores cannot be  
27 410 used interchangeably while assessing QALY during cost utility analysis. Finally, SF 6D had  
28 411 the lowest floor and ceiling effect, and was better at detecting different stages of the disease.  
29 412 Thus based on the evidence presented in this study, SF 6D appears to be more appropriate to  
30 413 be used among CKD patients.  
31  
32  
33  
34  
35  
36  
37

38 414

### 39 415 **Ethics approval and consent to participate**

40 416 The study is in accordance with Helsinki Declaration. The study protocol has been approved  
41 417 by the Ethics Committee of Colombo Medical Faculty. Permission was obtained from the  
42 418 Provincial Director of Health Service, to assess the CKD register available at his office.  
43 419 Participants gave their informed consent.  
44  
45  
46  
47

48 420

### 49 421 **Acknowledgement:**

50 422 Authors acknowledge Asanga Ranasinghe, Priyantha Kumara and Anura Ranasinghe for the  
51 423 support rendered during the study.  
52  
53  
54

55 424

### 56 425 **Funding**

57 426 This study was funded by the Ministry of Health, Sri Lanka  
58  
59

1 427

2 428 **Competing interests:** None declared.

3 429

4 430 **Patient consent :** Obtained.

5 431

6 432 **Author Contributions**

7 433 SK and SS : Research idea, study design, statistical analysis and drafting of the manuscript.

8 434 NG<sup>2</sup>: study design, data analysis/interpretation. NG<sup>1</sup>: participated in study design, data

9 435 interpretation and supervision. All authors read and approved the final manuscript.

10 436 *Provenance and peer review :* Not commissioned; externally peer reviewed.

11 437

12 438 **Data sharing statement**

13 439 The datasets used and/or analysed during the current study available from the corresponding

14 440 author on reasonable request.

15 441

16 442 **Figure legend**

17 443 Fig. 1. Distribution of EQ-5D (A) and SF-6D (B)

18 444 Fig. 2 Correlation between the EQ-5D-3L and the SF-6D utilities

19 445 Fig. 3 : Bland and Altman plot of differences between EQ-5D and SF-6D for patients with

20 446 CKD

21 447 Fig 4: The box-plots present the median, quartiles and extreme values for the EQ-5D and SF-

22 448 6D utility scores for CKD stage

23 449

**References**

1. Senanayake S, Gunawardena N, Paliyawadana P, Kularatna S, Peiris T. Validity and reliability of the Sri Lankan version of the kidney disease quality of life questionnaire (KDQOL-SF™). *Health and quality of life outcomes*. 2017;15(1):119.
2. Schieppati A, Remuzzi G. Chronic renal diseases as a public health problem: epidemiology, social, and economic implications. *Kidney International*. 2005;68:S7-S10.
3. Evaluation IfHMa. Global Burden of Disease 2010 Arrow Diagram: Institute for Health Metrics and Evaluation; 2010 [Available from: <http://vizhub.healthdata.org/irank/arrow.php>].
4. Rebollo-Rubio A, Morales-Asencio JM, Pons-Raventos ME, Mansilla-Francisco JJ. Review of studies on health related quality of life in patients with advanced chronic kidney disease in Spain. *Nefrologia*. 2015;35(1):92-109.
5. Mujais SK, Story K, Brouillette J, Takano T, Soroka S, Franek C, et al. Health-related quality of life in CKD patients: correlates and evolution over time. *Clinical Journal of the American Society of Nephrology*. 2009;4(8):1293-301.
6. Tsai Y-C, Hung C-C, Hwang S-J, Wang S-L, Hsiao S-M, Lin M-Y, et al. Quality of life predicts risks of end-stage renal disease and mortality in patients with chronic kidney disease. *Nephrology dialysis transplantation*. 2009;25(5):1621-6.
7. DeOreo PB. Hemodialysis patient-assessed functional health status predicts continued survival, hospitalization, and dialysis-attendance compliance. *American Journal of Kidney Diseases*. 1997;30(2):204-12.
8. Gussous Y, Theologis AA, Demb JB, Tangtiphaibontana J, Berven S. Correlation Between Lumbopelvic and Sagittal Parameters and Health-Related Quality of Life in Adults With Lumbosacral Spondylolisthesis. *Global spine journal*. 2018;8(1):17-24.
9. Howren MB. Quality-Adjusted Life Years (QALYs). *Encyclopedia of Behavioral Medicine*: Springer; 2013. p. 1605-6.
10. Torrance GW, Feeny D. Utilities and quality-adjusted life years. *International journal of technology assessment in health care*. 1989;5(4):559-75.
11. Drummond MF, Sculpher MJ, Claxton K, Stoddart GL, Torrance GW. *Methods for the economic evaluation of health care programmes*: Oxford university press; 2015.
12. Brooks R. EuroQol: the current state of play. *Health policy*. 1996;37(1):53-72.
13. Brazier J, Roberts J, Deverill M. The estimation of a preference-based measure of health from the SF-36. *Journal of health economics*. 2002;21(2):271-92.
14. Feeny D, Furlong W, Torrance GW, Goldsmith CH, Zhu Z, DePauw S, et al. Multiattribute and single-attribute utility functions for the health utilities index mark 3 system. *Medical care*. 2002;40(2):113-28.
15. Feeny D, Furlong W, Boyle M, Torrance GW. Multi-attribute health status classification systems. *Pharmacoeconomics*. 1995;7(6):490-502.
16. Wu J, Han Y, Zhao F-L, Zhou J, Chen Z, Sun H. Validation and comparison of EuroQoL-5 dimension (EQ-5D) and Short Form-6 dimension (SF-6D) among stable angina patients. *Health and quality of life outcomes*. 2014;12(1):156.
17. Stolk EA, Oppe M, Scalone L, Krabbe PF. Discrete choice modeling for the quantification of health states: the case of the EQ-5D. *Value in Health*. 2010;13(8):1005-13.
18. Kularatna S, Whitty JA, Johnson NW, Jayasinghe R, Scuffham PA. Valuing EQ-5D health states for Sri Lanka. *Quality of Life Research*. 2015;24(7):1785-93.
19. Kularatna S, Byrnes J, Chan YK, Ski CF, Carrington M, Thompson D, et al. Comparison of the EQ-5D-3L and the SF-6D (SF-12) contemporaneous utility scores in patients with cardiovascular disease. *Quality of Life Research*. 2017;26(12):3399-408.
20. Herdman M, Gudex C, Lloyd A, Janssen M, Kind P, Parkin D, et al. Development and preliminary testing of the new five-level version of EQ-5D (EQ-5D-5L). *Quality of life research*. 2011;20(10):1727-36.
21. Salaffi F, Carotti M, Ciapetti A, Gasparini S, Grassi W. A comparison of utility measurement using EQ-5D and SF-6D preference-based generic instruments in patients with rheumatoid arthritis. *Clinical and experimental rheumatology*. 2011;29(4):661-71.



- 1 503 22. Kwakkenbos L, Fransen J, Vonk MC, Becker ES, Jeurissen M, van den Hoogen FH, et al. A  
2 504 comparison of the measurement properties and estimation of minimal important differences of the  
3 505 EQ-5D and SF-6D utility measures in patients with systemic sclerosis. *Clinical and experimental*  
4 506 *rheumatology*. 2013;31(2 Suppl 76):50-6.
- 5 507 23. Rowen D, Young T, Brazier J, Gaugris S. Comparison of generic, condition-specific, and  
6 508 mapped health state utility values for multiple myeloma cancer. *Value in Health*. 2012;15(8):1059-  
7 509 68.
- 8 510 24. Lamers LM, Bouwmans CA, van Straten A, Donker MC, Hakkaart L. Comparison of EQ-5D and  
9 511 SF-6D utilities in mental health patients. *Health economics*. 2006;15(11):1229-36.
- 10 512 25. Barton GR, Bankart J, Davis AC. A comparison of the quality of life of hearing-impaired  
11 513 people as estimated by three different utility measures Un comparación de la calidad de vida de  
12 514 personas con trastornos auditivos estimada por tres diferentes medidas de utilidad. *International*  
13 515 *Journal of Audiology*. 2005;44(3):157-63.
- 14 516 26. Barton GR, Bankart J, Davis AC, Summerfield QA. Comparing utility scores before and after  
15 517 hearing-aid provision. *Applied health economics and health policy*. 2004;3(2):103-5.
- 16 518 27. van Stel HF, Buskens E. Comparison of the SF-6D and the EQ-5D in patients with coronary  
17 519 heart disease. *Health and Quality of Life Outcomes*. 2006;4(1):20.
- 18 520 28. Stavem K, Frøland SS, Hellum KB. Comparison of preference-based utilities of the 15D, EQ-  
19 521 5D and SF-6D in patients with HIV/AIDS. *Quality of Life Research*. 2005;14(4):971-80.
- 20 522 29. Petrou S, Hockley C. An investigation into the empirical validity of the EQ-5D and SF-6D  
21 523 based on hypothetical preferences in a general population. *Health economics*. 2005;14(11):1169-89.
- 22 524 30. McDonough CM, Tosteson AN. Measuring preferences for cost-utility analysis.  
23 525 *Pharmacoeconomics*. 2007;25(2):93-106.
- 24 526 31. Lwanga SK, Lemeshow S, Organization WH. Sample size determination in health studies: a  
25 527 practical manual. 1991.
- 26 528 32. Senanayake S, Gunawardena N, Paliwardana P, Bandara P, Haniffa R, Karunarathna R, et al.  
27 529 Symptom burden in chronic kidney disease; a population based cross sectional study. *BMC*  
28 530 *nephrology*. 2017;18(1):228.
- 29 531 33. Dolan P. Modeling valuations for EuroQol health states. *Medical care*. 1997;35(11):1095-  
30 532 108.
- 31 533 34. Ramos-Goni JM, Rivero-Arias O. eq5d: A command to calculate index values for the EQ-5D  
32 534 quality-of-life instrument. *Stata Journal*. 2011;11(1):120.
- 33 535 35. Lamers L, Bouwmans C, van Straten A, Donker M, Hakkaart L. Comparison of EQ-5D and SF-  
34 536 6D utilities in mental health patients. *Health economics*. 2006;15(11):1229-36.
- 35 537 36. Harrison M, Davies L, Bansback N, McCoy M, Verstappen S, Watson K, et al. The comparative  
36 538 responsiveness of the EQ-5D and SF-6D to change in patients with inflammatory arthritis. *Quality of*  
37 539 *Life Research*. 2009;18(9):1195.
- 38 540 37. Bland JM, Altman D. Statistical methods for assessing agreement between two methods of  
39 541 clinical measurement. *The lancet*. 1986;327(8476):307-10.
- 40 542 38. Tredoux C, Durrheim K. Numbers, hypotheses and conclusions: A course in statistics for the  
41 543 social sciences. Cape Town: University of Cape Town Press[Links]. 2002.
- 42 544 39. Levey AS, Stevens LA, Coresh J. Conceptual model of CKD: applications and implications.  
43 545 *American journal of kidney diseases*. 2009;53(3):S4-S16.
- 44 546 40. Seliger SL, Zhan M, Walker LD, Fink JC. Chronic kidney disease adversely influences patient  
45 547 safety. *Journal of the American Society of Nephrology*. 2008;19(12):2414-9.
- 46 548 41. Stevens PE, Levin A. Evaluation and management of chronic kidney disease: synopsis of the  
47 549 kidney disease: improving global outcomes 2012 clinical practice guideline. *Annals of internal*  
48 550 *medicine*. 2013;158(11):825-30.
- 49 551 42. Tseng C-L, Lafrance J-P, Lu S-E, Soroka O, Miller DR, Maney M, et al. Variability in estimated  
50 552 glomerular filtration rate values is a risk factor in chronic kidney disease progression among patients  
51 553 with diabetes. *BMC nephrology*. 2015;16(1):34.
- 52 554 43. Kularatna S, Byrnes J, Chan YK, Ski CF, Carrington M, Thompson D, et al. Comparison of the  
53 555 EQ-5D-3L and the SF-6D (SF-12) contemporaneous utility scores in patients with cardiovascular  
54 556 disease. *Quality of life research : an international journal of quality of life aspects of treatment, care*  
55 557 *and rehabilitation*. 2017;26(12):3399-408.

- 1 558 44. Cohen J. A power primer. *Psychological bulletin*. 1992;112(1):155.
- 2 559 45. Litwin MS, Fink A. *How to measure survey reliability and validity*: Sage; 1995.
- 3 560 46. Sack TH, Barton GR, Jenkinson C, Doherty M, Avery AJ, Muir KR. Comparing cost-utility  
4 561 estimates: does the choice of EQ-5D or SF-6D matter? *Med Care*. 2009;889-95.
- 5 562 47. Grieve R, Grishchenko M, Cairns J. SF-6D versus EQ-5D: reasons for differences in utility  
6 563 scores and impact on reported cost-utility. *The European journal of health economics*.  
7 564 2009;10(1):15-23.
- 8 565 48. Stewart ST, Cutler DM, Rosen AB. Comparison of Trends in US Health-Related Quality of Life  
9 566 over the 2000's Using the SF-6D, HALex, EQ-5D, and EQ-5D Visual Analog Scale versus a Broader Set  
10 567 of Symptoms and Impairments. *Medical care*. 2014;52(12):1010.
- 11 568 49. Zhao FI, Yue M, Yang H, Wang T, Wu Jh, Li SC. Validation and comparison of EuroQol and  
12 569 short form 6D in chronic prostatitis patients. *Value in Health*. 2010;13(5):649-56.
- 13 570 50. Cunillera O, Tresserras R, Rajmil L, Vilagut G, Brugulat P, Herdman M, et al. Discriminative  
14 571 capacity of the EQ-5D, SF-6D, and SF-12 as measures of health status in population health survey.  
15 572 *Quality of Life Research*. 2010;19(6):853-64.
- 16 573 51. Bharmal M, Thomas J. Comparing the EQ-5D and the SF-6D descriptive systems to assess  
17 574 their ceiling effects in the US general population. *Value in Health*. 2006;9(4):262-71.
- 18 575 52. Janssen M, Pickard AS, Golicki D, Gudex C, Niewada M, Scalone L, et al. Measurement  
19 576 properties of the EQ-5D-5L compared to the EQ-5D-3L across eight patient groups: a multi-country  
20 577 study. *Quality of Life Research*. 2013;22(7):1717-27.
- 21 578 53. Bharmal M, Thomas III J. Comparing the EQ-5D and the SF-6D descriptive systems to assess  
22 579 their ceiling effects in the US general population. *Value Health*. 2006;9(4):262-71.
- 23 580 54. de Boer IH, Olan GA, Patel UD. Screening for chronic kidney disease. *Ann Intern Med*.  
24 581 2013;158(5 Pt 1):362-3.
- 25 582 55. Hummel A. Chronic renal failure, a frequent and asymptomatic pathology. *Soins; la revue de*  
26 583 *reference infirmiere*. 2010(745):24-6.
- 27 584 56. Jesky MD, Dutton M, Dasgupta I, Yadav P, Ng KP, Fenton A, et al. Health-related quality of  
28 585 life impacts mortality but not progression to end-stage renal disease in pre-dialysis chronic kidney  
29 586 disease: a prospective observational study. *PloS one*. 2016;11(11):e0165675.
- 30 587
- 31
- 32
- 33 588
- 34
- 35
- 36
- 37
- 38
- 39
- 40
- 41
- 42
- 43
- 44
- 45
- 46
- 47
- 48
- 49
- 50
- 51
- 52
- 53
- 54
- 55
- 56
- 57
- 58
- 59
- 60



589 **Tables**

590

591 **Table 1 : Demographic distribution of the sample by the EQ-5D-3L and the SF-6D utility**  
592 **scores**

| Variable            | N (%)      | EQ-5D-3L utility mean (SD) | Sf-6D utility mean (SD) | p value <sup>#</sup> |
|---------------------|------------|----------------------------|-------------------------|----------------------|
| All sample          | 1096       | 0.540 (0.35)               | 0.534 (0.09)            | <0.001 <sup>*</sup>  |
| Sex                 |            |                            |                         |                      |
| Male                | 686 (62.6) | 0.561 (0.34)               | 0.532 (0.10)            | <0.001 <sup>*</sup>  |
| Female              | 410 (37.4) | 0.505 (0.37)               | 0.539 (0.09)            | 0.342                |
| Age (years)         |            |                            |                         |                      |
| Less than 20        | 07 (0.6)   | 0.570 (0.44)               | 0.455 (0.09)            | 0.235                |
| 20-40               | 45 (4.1)   | 0.591 (0.34)               | 0.536 (0.09)            | 0.103                |
| 41-60               | 562 (51.3) | 0.555 (0.35)               | 0.540 (0.10)            | <0.001 <sup>*</sup>  |
| More than 60        | 482 (44.0) | 0.517 (0.35)               | 0.529 (0.08)            | 0.006 <sup>*</sup>   |
| Education status    |            |                            |                         |                      |
| No formal education | 81 (7.4)   | 0.448 (0.42)               | 0.508 (0.09)            | 0.441                |
| 5 Grade             | 413 (37.7) | 0.529 (0.35)               | 0.536 (0.09)            | 0.001 <sup>*</sup>   |
| 6-11 Grade          | 377 (34.4) | 0.556 (0.34)               | 0.533 (0.10)            | <0.001 <sup>*</sup>  |
| GCE O/L passed      | 190 (17.3) | 0.554 (0.34)               | 0.540 (0.09)            | 0.007 <sup>*</sup>   |
| GCE A/L passed      | 35 (3.2)   | 0.618 (0.34)               | 0.540 (0.09)            | 0.225                |
| Employment status   |            |                            |                         |                      |
| Employed            | 380 (34.7) | 0.675 (0.25)               | 0.547 (0.10)            | <0.001 <sup>*</sup>  |
| Not employed        | 716 (65.3) | 0.468 (0.37)               | 0.528 (0.09)            | 0.417                |
| Comorbidities       |            |                            |                         |                      |
| Present             | 778 (71.0) | 0.505 (0.36)               | 0.532 (0.09)            | 0.037 <sup>*</sup>   |
| Absent              | 318 (29.0) | 0.625 (0.29)               | 0.542 (0.10)            | <0.001 <sup>*</sup>  |
| CKD stage           |            |                            |                         |                      |
| Early stage         | 254 (24.0) | 0.588 (0.30)               | 0.551 (0.10)            | <0.001 <sup>*</sup>  |
| Stage IV            | 614 (58.1) | 0.566 (0.42)               | 0.536 (0.09)            | <0.001 <sup>*</sup>  |
| Stage V             | 151 (14.3) | 0.467 (0.42)               | 0.523 (0.08)            | 0.808                |
| Dialysis            | 38 (3.6)   | 0.126 (0.39)               | 0.432 (0.07)            | <0.001 <sup>*</sup>  |

593 <sup>#</sup> Wilcoxon signed-rank test ; <sup>\*</sup> Significant at p<0.05

594

595 **Table 2 : Distribution of the sample by the EQ-5D-3L dimensions**

|                 | Mobility (%) | Self-care (%) | Usual activities (%) | Pain/discomfort (%) | Anxiety/depression (%) |
|-----------------|--------------|---------------|----------------------|---------------------|------------------------|
| No problem      | 515 (47.0)   | 644 (58.8)    | 473 (43.2)           | 182 (16.6)          | 261 (23.8)             |
| Some problem    | 559 (51.0)   | 421 (38.4)    | 587 (53.6)           | 739 (67.4)          | 680 (62.0)             |
| Extreme problem | 22 (2.0)     | 31 (2.8)      | 36 (3.3)             | 175 (16.0)          | 155 (14.1)             |

596

597

598 **Table 3 : Distribution of the sample by the SF-6D dimensions**

|                | Physical functioning (%) | Role limitation (%) | Social functioning (%) | Pain (%)   | Mental health (%) | Vitality (%) |
|----------------|--------------------------|---------------------|------------------------|------------|-------------------|--------------|
| 1 <sup>a</sup> | 8 (0.7)                  | 173 (15.8)          | 17 (1.6)               | 7 (0.6)    | 6 (0.6)           | 2 (0.2)      |
| 2              | 22 (2.0)                 | 5 (0.5)             | 60 (5.5)               | 5 (0.5)    | 130 (11.9)        | 194 (17.7)   |
| 3              | 304 (27.7)               | 135 (12.3)          | 482 (44.0)             | 59 (5.4)   | 582 (53.1)        | 498 (45.4)   |
| 4              | 356 (32.5)               | 783 (71.4)          | 481 (43.9)             | 452 (41.2) | 364 (33.2)        | 287 (26.2)   |
| 5              | 87 (7.9)                 | NA                  | 56(5.1)                | 333 (30.4) | 14 (1.3)          | 115 (10.5)   |
| 6 <sup>b</sup> | 319 (29.1)               | NA                  | NA                     | 240 (21.9) | NA                | NA           |

599 <sup>a</sup> No problems600 <sup>b</sup> Severe problems

601

602

603

604 **Table 4 : Intra Class Correlation between the EQ-5D-3L and the SF-6D**

|                      | Mobility | Self-care | Usual activities | Pain/discomfort | Anxiety/depression |
|----------------------|----------|-----------|------------------|-----------------|--------------------|
| Physical functioning | 0.381*   | 0.326*    | 0.296*           | 0.382*          | 0.381*             |
| Role limitation      | 0.023    | -0.003    | -0.104           | 0.016           | 0.138*             |
| Social functioning   | 0.517*   | 0.424*    | 0.464*           | 0.566*          | 0.528*             |
| Pain                 | 0.475*   | 0.330*    | 0.355*           | 0.482*          | 0.484*             |
| Mental health        | 0.293*   | 0.323*    | 0.295*           | 0.240*          | 0.244*             |
| Vitality             | 0.322*   | 0.148*    | 0.255*           | 0.475*          | 0.453*             |

605 \* Significant at  $p < 0.05$  level

606

607

608 **Table 5 : Discrimination across clinical severity groups**

| CKD stage   | EQ-5D-3L      |                 |         |                  |       | SF-6D         |                 |         |                  |       |
|-------------|---------------|-----------------|---------|------------------|-------|---------------|-----------------|---------|------------------|-------|
|             | N             | Mean (SD)       | Media n | Sig <sup>#</sup> | ES    | N             | Mean (SD)       | Media n | Sig <sup>#</sup> | ES    |
| Early stage | 254<br>(24.0) | 0.588<br>(0.30) | 0.656   | <0.001           | 0.071 | 254<br>(24.0) | 0.551<br>(0.10) | 0.570   | <0.001           | 0.141 |
| IV          | 614<br>(58.1) | 0.566<br>(0.42) | 0.620   |                  |       | 614<br>(58.1) | 0.536<br>(0.09) | 0.560   |                  |       |
| V           | 151<br>(14.3) | 0.467<br>(0.42) | 0.585   |                  |       | 151<br>(14.3) | 0.523<br>(0.08) | 0.550   |                  |       |
| Dialysis    | 38<br>(3.6)   | 0.126<br>(0.39) | -0.016  |                  |       | 38<br>(3.6)   | 0.432<br>(0.07) | 0.410   |                  |       |
|             |               |                 |         |                  |       |               |                 |         |                  |       |

609 <sup>#</sup> Kruskal–Wallis test

1  
2  
3  
4  
5  
6  
7  
8  
9  
10  
11  
12  
13  
14  
15  
16  
17  
18  
19  
20  
21  
22  
23  
24  
25  
26  
27  
28  
29  
30  
31  
32  
33  
34  
35  
36  
37  
38  
39  
40  
41  
42  
43  
44  
45  
46  
47  
48  
49  
50  
51  
52  
53  
54  
55  
56  
57  
58  
59  
60

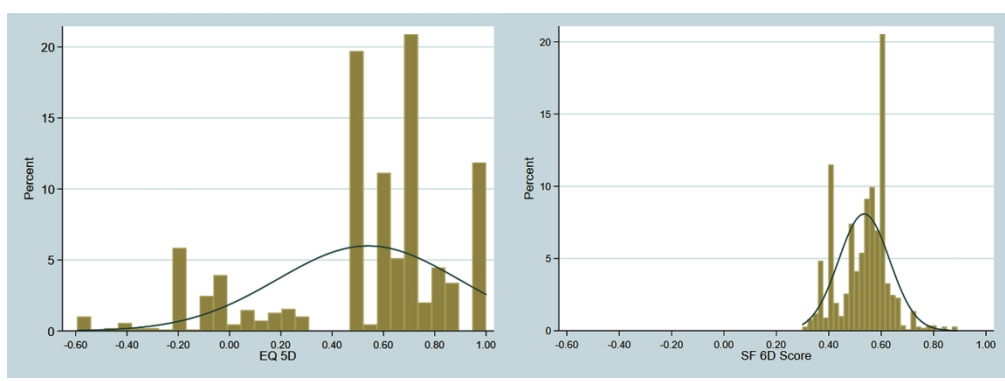

Fig. 1. Distribution of EQ-5D (A) and SF-6D (B)

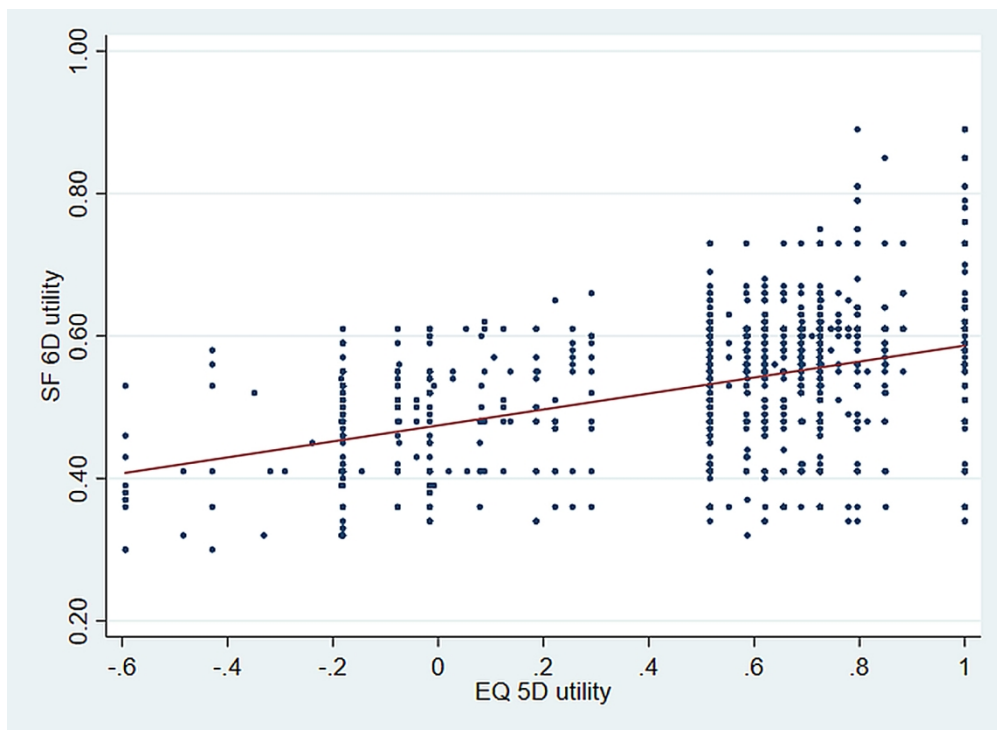

Fig. 2 Correlation between the EQ-5D-3L and the SF-6D utilities

137x99mm (300 x 300 DPI)

1  
2  
3  
4  
5  
6  
7  
8  
9  
10  
11  
12  
13  
14  
15  
16  
17  
18  
19  
20  
21  
22  
23  
24  
25  
26  
27  
28  
29  
30  
31  
32  
33  
34  
35  
36  
37  
38  
39  
40  
41  
42  
43  
44  
45  
46  
47  
48  
49  
50  
51  
52  
53  
54  
55  
56  
57  
58  
59  
60

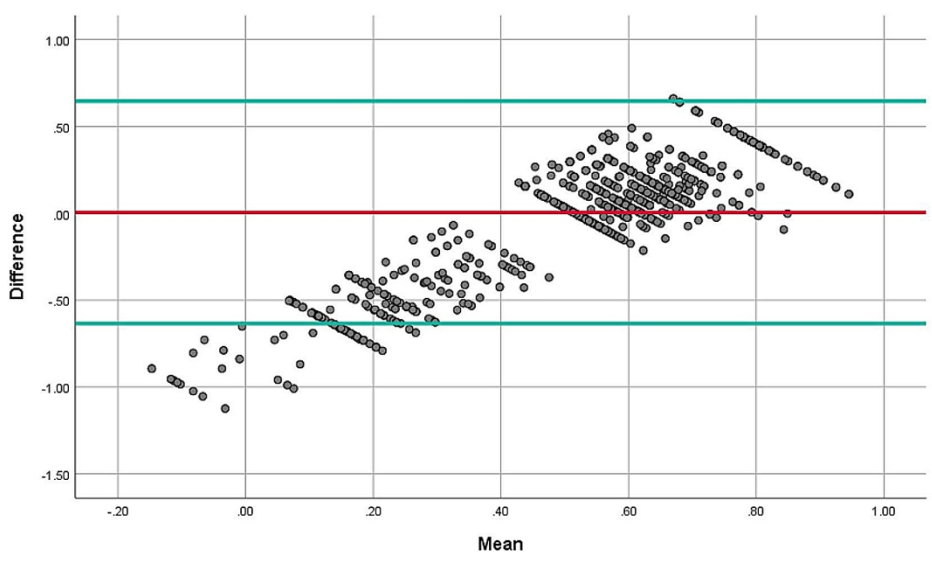

Fig. 3 : Bland and Altman plot of differences between EQ-5D and SF-6D for patients with CKD

166x90mm (300 x 300 DPI)

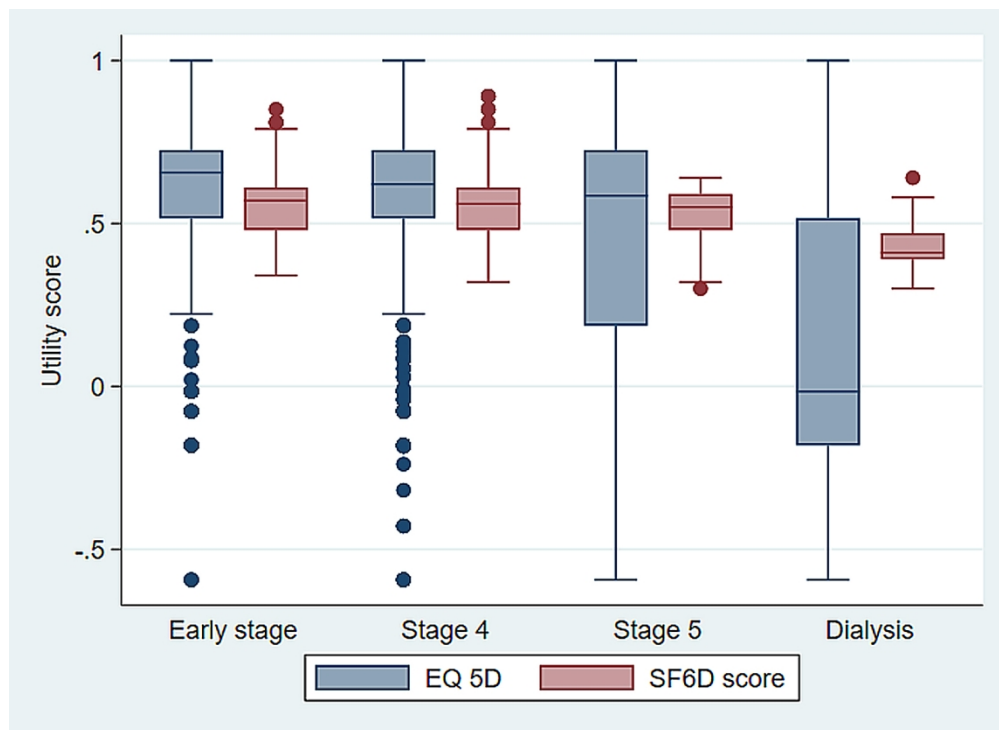

Fig 4: The box-plots present the median, quartiles and extreme values for the EQ-5D and SF-6D utility scores for CKD stage

137x99mm (300 x 300 DPI)

STROBE Statement—Checklist of items that should be included in reports of *cross-sectional studies*

|                              | Item No | Recommendation                                                                                                                                                                                    | Line number |
|------------------------------|---------|---------------------------------------------------------------------------------------------------------------------------------------------------------------------------------------------------|-------------|
| <b>Title and abstract</b>    | 1       | (a) Indicate the study's design with a commonly used term in the title or the abstract                                                                                                            | 1           |
|                              |         | (b) Provide in the abstract an informative and balanced summary of what was done and what was found                                                                                               | 16          |
| <b>Introduction</b>          |         |                                                                                                                                                                                                   |             |
| Background/rationale         | 2       | Explain the scientific background and rationale for the investigation being reported                                                                                                              | 67          |
| Objectives                   | 3       | State specific objectives, including any prespecified hypotheses                                                                                                                                  | 115         |
| <b>Methods</b>               |         |                                                                                                                                                                                                   |             |
| Study design                 | 4       | Present key elements of study design early in the paper                                                                                                                                           | 121         |
| Setting                      | 5       | Describe the setting, locations, and relevant dates, including periods of recruitment, exposure, follow-up, and data collection                                                                   | 121-126     |
| Participants                 | 6       | (a) Give the eligibility criteria, and the sources and methods of selection of participants                                                                                                       | 129-134     |
| Variables                    | 7       | Clearly define all outcomes, exposures, predictors, potential confounders, and effect modifiers. Give diagnostic criteria, if applicable                                                          | 157-190     |
| Data sources/<br>measurement | 8*      | For each variable of interest, give sources of data and details of methods of assessment (measurement). Describe comparability of assessment methods if there is more than one group              | 157-190     |
| Bias                         | 9       | Describe any efforts to address potential sources of bias                                                                                                                                         | NA          |
| Study size                   | 10      | Explain how the study size was arrived at                                                                                                                                                         | 123         |
| Quantitative variables       | 11      | Explain how quantitative variables were handled in the analyses. If applicable, describe which groupings were chosen and why                                                                      | 157-190     |
| Statistical methods          | 12      | (a) Describe all statistical methods, including those used to control for confounding                                                                                                             | 193-207     |
|                              |         | (b) Describe any methods used to examine subgroups and interactions                                                                                                                               | NA          |
|                              |         | (c) Explain how missing data were addressed                                                                                                                                                       | NA          |
|                              |         | (d) If applicable, describe analytical methods taking account of sampling strategy                                                                                                                | NA          |
|                              |         | (e) Describe any sensitivity analyses                                                                                                                                                             | NA          |
| <b>Results</b>               |         |                                                                                                                                                                                                   |             |
| Participants                 | 13*     | (a) Report numbers of individuals at each stage of study—eg numbers potentially eligible, examined for eligibility, confirmed eligible, included in the study, completing follow-up, and analysed | 266-267     |
|                              |         | (b) Give reasons for non-participation at each stage                                                                                                                                              | 267         |
|                              |         | (c) Consider use of a flow diagram                                                                                                                                                                | NA          |
| Descriptive data             | 14*     | (a) Give characteristics of study participants (eg demographic, clinical, social) and information on exposures and potential confounders                                                          | 266 - 274   |
|                              |         | (b) Indicate number of participants with missing data for each variable of interest                                                                                                               | NA          |



|                          |     |                                                                                                                                                                                                              |           |
|--------------------------|-----|--------------------------------------------------------------------------------------------------------------------------------------------------------------------------------------------------------------|-----------|
| Outcome data             | 15* | Report numbers of outcome events or summary measures                                                                                                                                                         | NA        |
| Main results             | 16  | (a) Give unadjusted estimates and, if applicable, confounder-adjusted estimates and their precision (eg, 95% confidence interval). Make clear which confounders were adjusted for and why they were included | NA        |
|                          |     | (b) Report category boundaries when continuous variables were categorized                                                                                                                                    | Table 1   |
|                          |     | (c) If relevant, consider translating estimates of relative risk into absolute risk for a meaningful time period                                                                                             | NA        |
| Other analyses           | 17  | Report other analyses done—eg analyses of subgroups and interactions, and sensitivity analyses                                                                                                               | NA        |
| <b>Discussion</b>        |     |                                                                                                                                                                                                              |           |
| Key results              | 18  | Summarise key results with reference to study objectives                                                                                                                                                     | 335 - 340 |
| Limitations              | 19  | Discuss limitations of the study, taking into account sources of potential bias or imprecision. Discuss both direction and magnitude of any potential bias                                                   | 397       |
| Interpretation           | 20  | Give a cautious overall interpretation of results considering objectives, limitations, multiplicity of analyses, results from similar studies, and other relevant evidence                                   | 405 - 413 |
| Generalisability         | 21  | Discuss the generalisability (external validity) of the study results                                                                                                                                        | 410 - 413 |
| <b>Other information</b> |     |                                                                                                                                                                                                              |           |
| Funding                  | 22  | Give the source of funding and the role of the funders for the present study and, if applicable, for the original study on which the present article is based                                                | 425       |

\*Give information separately for exposed and unexposed groups.

**Note:** An Explanation and Elaboration article discusses each checklist item and gives methodological background and published examples of transparent reporting. The STROBE checklist is best used in conjunction with this article (freely available on the Web sites of PLoS Medicine at <http://www.plosmedicine.org/>, Annals of Internal Medicine at <http://www.annals.org/>, and Epidemiology at <http://www.epidem.com/>). Information on the STROBE Initiative is available at [www.strobe-statement.org](http://www.strobe-statement.org).

# BMJ Open

## Comparison of the EQ-5D-3L and the SF-6D (SF-36) contemporaneous utility scores in patients with Chronic Kidney Disease in Sri Lanka; a cross sectional survey

|                                 |                                                                                                                                                                                                                                                                                                                                                                                       |
|---------------------------------|---------------------------------------------------------------------------------------------------------------------------------------------------------------------------------------------------------------------------------------------------------------------------------------------------------------------------------------------------------------------------------------|
| Journal:                        | <i>BMJ Open</i>                                                                                                                                                                                                                                                                                                                                                                       |
| Manuscript ID                   | bmjopen-2018-024854.R2                                                                                                                                                                                                                                                                                                                                                                |
| Article Type:                   | Research                                                                                                                                                                                                                                                                                                                                                                              |
| Date Submitted by the Author:   | 25-Nov-2018                                                                                                                                                                                                                                                                                                                                                                           |
| Complete List of Authors:       | Kularatna, Sanjeewa; Australian Centre For Health Services Innovation, Queensland University of technology<br>Senanayake, Sameera; Australian Centre For Health Services Innovation, Queensland University of Technology<br>Gunawardena, Nalika; World Health Organization<br>Graves, Nicholas; Australian Centre For Health Services Innovation, Queensland University of Technology |
| <b>Primary Subject Heading</b>: | Health services research                                                                                                                                                                                                                                                                                                                                                              |
| Secondary Subject Heading:      | Health economics, Health services research, Renal medicine                                                                                                                                                                                                                                                                                                                            |
| Keywords:                       | Cost utility analysis, Quality-Adjusted Life Years (QALYs), utility, Chronic Kidney Disease (CKD)                                                                                                                                                                                                                                                                                     |
|                                 |                                                                                                                                                                                                                                                                                                                                                                                       |

SCHOLARONE™  
Manuscripts

1           1    **Comparison of the EQ-5D-3L and the SF-6D (SF-36) contemporaneous utility scores in**  
2  
3           2    **patients with Chronic Kidney Disease in Sri Lanka; a cross sectional survey**  
4

5           3  
6           4  
7  
8           5    Sanjeewa Kularatna<sup>1</sup>, Sameera Senanayake<sup>1</sup>, Nalika Gunawardena<sup>2</sup>, Nicholas Graves<sup>1</sup>  
9

10          6  
11          7    <sup>1</sup>Australian Centre for Health Services Innovation, Queensland University of Technology  
12

13          8    <sup>2</sup> World Health Organization, Sri Lanka  
14

15          9  
16  
17         10   **Corresponding author;**

18                 11         Sanjeewa Kularatna - *sanjeewa.kularatna@qut.edu.au*  
19

20         12  
21         13    **Word count : 3277**  
22

1  
2  
3  
4  
5  
6  
7  
8  
9  
10  
11  
12  
13  
14  
15  
16  
17  
18  
19  
20  
21  
22  
23  
24  
25  
26  
27  
28  
29  
30  
31  
32  
33  
34  
35  
36  
37  
38  
39  
40  
41  
42  
43  
44  
45  
46  
47  
48  
49  
50  
51

## 16 Abstract

17  
18 **Objectives** : The aim of this study was to compare utility weights of EQ-5D-3L and SF-6D in  
19 a representative cohort of patients with Chronic Kidney Disease (CKD). A cost-utility  
20 analysis is designed to report the change to costs required to achieve an estimated change to  
21 Quality-Adjusted Life Years (QALYs). The quality component of a QALY is measured by  
22 utility. Utility represents the preference of general population for a given health state.  
23 Classification systems of the multi-attribute utility instruments (MAUI) are used to define  
24 these health states. Utility weights developed from different classification systems can vary  
25 and may affect the conclusions from cost-utility analyses.

26  
27 **Design**: A community based cross sectional study

28  
29 **Setting** : Anuradhapura a rural district in Sri Lanka.

30  
31 **Participants**: A representative sample of 1096 CKD patients, selected using the population-  
32 based CKD register, completed the EQ-5D-3L and SF-36. SF-6D was constructed from the  
33 SF-36 according to the published algorithm. The study assessed discrimination, correlation  
34 and differences across the two instruments.

35  
36 **Results**: Study participants were predominantly male (62.6%). Mean EQ-5D-3L utility score  
37 was 0.540 (SD 0.35) compared with 0.534 (SD 0.09) for the SF-6D ( $p=0.588$ ). The  
38 correlation ( $r$ ) between the scores was 0.40 ( $p<0.001$ ). Utility scores were significantly  
39 different in both males and females between the two tools, but there was no difference in age  
40 and educational categories. Both MAUI scores were significantly lower ( $p<0.001$ ) among  
41 those who were in more advanced stages of the disease and the corresponding utility scores  
42 of the two instruments in different CKD stages were also significantly different ( $p<0.05$ ).  
43 The largest effect size was seen among the dialysis patients.

44  
45 **Conclusions**: The correlation between the scores was moderate. SF 6D had the lowest floor  
46 and ceiling effect, and was better at detecting different stages of the disease. Thus based on the  
47 evidence presented in this study, SF 6D appears to be more appropriate to be used among CKD  
48 patients

49  
50 **Key words**: Cost utility analysis, Quality-Adjusted Life Years (QALYs), utility, Chronic  
51 Kidney Disease (CKD)

1 52 **Strengths and limitations of this study**

- 2
- 3 53 • The response rate of the study is very high.
- 4
- 5 54 • Both tools used in the study (EQ 5D 3L and SF 36) have been previously validated to
- 6 the Sri Lankan setting before.
- 7 55
- 8 56 • Data collectors were experienced for many local and international studies done among
- 9 CKD patients in Sri Lanka and further they were trained by the principal investigator to
- 10 57 ensure the quality of the data collected.
- 11 58
- 12 59 • Our study was a cross-sectional study, thus we could not assess how utility scores of
- 13 the two instruments change over time.
- 14 60
- 15 61 • Some of the information related to QOL in SF-36 is considered to be sensitive in
- 16 nature and the fact that this information was obtained utilising an interviewer-
- 17 62 administered questionnaire could have led to some under-reporting in the assessment
- 18 of QOL though many measures were taken to minimize this issue.
- 19 63
- 20 64
- 21 65
- 22 66
- 23 67
- 24
- 25
- 26
- 27
- 28
- 29
- 30
- 31
- 32
- 33
- 34
- 35
- 36
- 37
- 38
- 39
- 40
- 41
- 42
- 43
- 44
- 45
- 46
- 47
- 48
- 49
- 50
- 51
- 52
- 53
- 54
- 55
- 56
- 57
- 58
- 59
- 60

## 68 **Introduction**

69 Chronic kidney disease (CKD) is a substantial public health problem with adverse  
70 psychological, physical and economic outcomes. The burden of CKD is increasing  
71 globally(1). World Health Report (2002) and Global Burden of Disease (GBD) project stated  
72 that the diseases of the kidney contribute much to the global disease burden with  
73 approximately 850,000 deaths every year globally (2). Furthermore, according to GBD study  
74 conducted in 2010, of the top causes of DALY, CKD is ranked 29<sup>th</sup> globally, 23<sup>rd</sup> in South  
75 East Asia and 14<sup>th</sup> in Sri Lanka (3). Due to the progressive and disabling nature of CKD, it  
76 poses a substantial impact on the quality of life (QOL) of individuals. It is important to  
77 measure QOL indicators for the management of chronic kidney disease patients. Several  
78 studies have demonstrated a relationship between reduced QOL and increased morbidity and  
79 mortality (4-7).

81 World over, the importance of including QOL indicators in the clinical management of  
82 patients has been highlighted. This has come to the limelight after several studies  
83 demonstrated the strong relationship between reduced QOL and increased morbidity and  
84 mortality (5, 8). Meantime, economic evaluation has become increasingly popular among  
85 researchers and policy makers during resource allocation in recent years. Due to the  
86 relationship between QOL and clinical outcome, during the recent years, QOL has become an  
87 important health outcome in economic evaluations. In cost utility analysis (CUA), a method  
88 of economic evaluation, outcomes are usually measured in Quality-Adjusted Life Years  
89 (QALYs), which is a measure of QOL.

91 The concept of QALYs was developed in the 1970s. It can measure the changes of an  
92 individual's quality and quantity of life and can also aggregate these improvements across  
93 individual (9, 10). The change in the quality of life in QALY is measured using a set of  
94 weights, called utilities, which reflect different health states. For all possible health states,  
95 utilities should be measured on a scale where 1 refers to best imaginable health and 0 refers  
96 to death (11). Measuring utilities for different health states is complex and time-consuming.  
97 Thus, Multi Attribute Utility Instruments (MAUI) such as EuroQol-5D (EQ-5D-3L) (12),  
98 Short Form-6D (SF-6D) (13) or the Health Utility Index (HUI) (14, 15) are used to define  
99 different health states. The utility scores for different health states in different instruments are  
100 derived from methods such as Standard Gambling method (16), Discrete Choice Experiments  
101 (17) and Time Trade-Off experiments (18). EQ-5D-3L is the most widely used utility  
102 instrument at present (19). EQ-5D-5L, which is the newer version of EQ-5D, has also been  
103 developed and tested recently (20).

1 104  
2  
3 105 Since all the MAUIs aim at measuring the health state of individuals, all the instruments  
4  
5 106 should generate the same utility value for a particular state of health. However, the evidence  
6  
7 107 indicates that there is an essential difference in the utility scores for a particular health state  
8  
9 108 between different instruments (19, 21-29). This, in turn, indicates that the choice of the  
10  
11 109 MAUI used may adversely influence the results of CUA and thereby the decision-making  
12  
13 110 process (30). Furthermore, for incremental analyses, use of different MAUIs may lead to  
14  
15 111 different results regarding the magnitude, direction or significance of any change in health-  
16  
17 112 related quality of life measure.

18  
19 114 Though the differences between MAUIs have been evaluated in many disease conditions (19,  
20  
21 115 21, 22, 24), there are no evidence in the literature comparing MAUIs using patients with  
22  
23 116 CKD. The aim of our study is to compare contemporaneous EQ-5D-3L and SF-6D utility  
24  
25 117 scores in patients with CKD. Results may be useful for researchers selecting a generic MAUI  
26  
27 118 to estimate utilities for use in economic modelling of treatments for CKD.

28 119

## 29 120 **Methods**

### 30 121 *Participant selection*

31 122 A population-based descriptive cross-sectional study was conducted in the district of  
32  
33 123 Anuradhapura in the North Central Province (NCP) of Sri Lanka between Septembers to  
34  
35 124 December 2015. The study population consisted of 1162 confirmed CKD patients, calculated  
36  
37 125 using the appropriate formula (31), who were over 18 years old with documented evidence of  
38  
39 126 CKD living in the Anuradhapura district. The diagnosis of CKD was made if the Glomerular  
40  
41 127 Filtration Rate (GFR) was less than 60 ml/min per 1.73m<sup>2</sup> of body surface area in two  
42  
43 128 measurements made three months apart.

44 129

45  
46 130 The inclusion criteria were patients above 18 years of age and those who were diagnosed as  
47  
48 131 having CKD by a specialist nephrologist or a consultant physician. Presence of evidence of  
49  
50 132 such diagnosis was made by way of diagnosis cards, clinic records or any other record issued  
51  
52 133 by a specialist nephrologist, a consultant physician or a government hospital. Patients who  
53  
54 134 had previous renal transplantation, who were unable to provide rational information due to  
55  
56 135 any cause (e.g. mental retardation) and who were critically ill were excluded from the study.

57 136

58 137 The study instrument was an interviewer-administered questionnaire to gather information on the  
59  
60 138 socio-demographic information, CKD related information, EQ-5D-3L and SF 36.

139



1 140 Five Public Health Inspectors working in the CKD unit in the North Central Province were used  
2 141 for the data collection and all have been working in the unit for more than 5 years and they had  
3 142 experience in functioning as data collectors for many local and international studies done among  
4 143 CKD patients in the NCP. The data collectors assessed the eligibility of patients by reviewing  
5 144 their clinical records. Informed consent was obtained from those who were eligible for  
6 145 participation in the study before doing the face-to-face interview.  
7  
8  
9  
10  
11  
12

13 147 The study was conducted in all nineteen Medical Officer of Health (MOH) areas of the  
14 148 Anuradhapura district. The number of participants to be included from each MOH area was  
15 149 based on probability proportionate to the size of CKD patients registered in each of the MOH  
16 150 areas. The required number of participants from each MOH area was selected using simple  
17 151 random sampling method. The population-based CKD register – which records the patients  
18 152 with a confirmed diagnosis of CKD from renal clinics in hospitals of the NCP since 2003 –  
19 153 was used as the sampling frame. The register was obtained from the office of the Provincial  
20 154 Director of Health Services (32).  
21  
22  
23  
24  
25  
26  
27  
28

### 29 156 ***Calculation of utility scores***

30 157 Currently, there is no algorithm based on preferences of the Sri Lankan public to score the  
31 158 SF-6D on a utility scale. Therefore, the UK algorithm was used for this purpose (13).

32 159 Though Sri Lankan EQ-5D-3L utility scores are available (18), the UK utility scores were  
33 160 used for the EQ-5D-3L (33) because of the unavailability of comparable Sri Lankan SF-6D  
34 161 utility scores as mentioned earlier. This allowed the comparison of utility scores from the  
35 162 same country.  
36  
37  
38  
39  
40  
41

42 164 The EQ-5D-3L instrument contains five domains; mobility, self-care, usual activities, pain /  
43 165 discomfort and anxiety / depression. Each domain has one item and each item has three  
44 166 levels: one denoting no problems and three denoting severe problems (12). Thus, EQ-5D-3L  
45 167 has mutually exclusive 243 different health states.  
46  
47  
48  
49

50 168  
51 169 SF-6D is derived from either SF-36 or SF-12 (Version 1 and Version 2). The current study  
52 170 utilised SF-36 for the data collection. SF-36 includes 36 items that measure eight domains;  
53 171 role limitations caused by physical problems (4 items), physical function (10 items), role  
54 172 limitations caused by emotional problems (3 items), pain (2 items), social function (2 items),  
55 173 general health perceptions (5 items), emotional well-being (5 items) and energy / fatigue (4  
56 174 items). Questions have different answer options which range from two to six. While scoring,  
57 175 each question is scored in a scale ranging from 0 (worst health) to 100 (best health). All items

1 176 in a domain are summed up and averaged to give an average score for each domain which  
2  
3 177 ranges from 0 (worst health) to 100 (best health). To calculate the utility scores of the SF-6D,  
4  
5 178 11 items are used covering six domains; physical functioning, role limitation, social  
6  
7 179 functioning, pain, mental health and vitality (13).

8 180  
9  
10 181 The EQ-5D-3L utility calculation was undertaken using the STATA syntax developed by  
11  
12 182 Ramos-Goni et al. (34). The SF-6D scores were computed based on published algorithms  
13  
14 183 (13). Patients for whom one of the two measurements was missing were excluded from the  
15  
16 184 analysis.

17 185  
18  
19 186 The EQ-5D-3L utility scores range from -0.59, 0=being dead; negative values represent  
20  
21 187 health status considered worse than “dead”, to 1.00 which indicate best imaginable health.  
22  
23 188 The SF-6D utility scores ranged from 0.296 which indicate severely impaired levels in all  
24  
25 189 dimensions to 1.0 which indicates no difficulty in any dimensions.

26 190  
27 191 **Data analysis**  
28  
29 192 STATA 15.1 software was used for the analysis. Mean utility scores on each instrument were  
30  
31 193 compared by socio-demographic characteristics. Normality of the two distributions were  
32  
33 194 assessed using Kolmogorov-Smirnov and Shapiro-Wilk tests. Wilcoxon signed-rank test  
34  
35 195 was used to assess the difference between the two instruments in each socio-demographic  
36  
37 196 class (35). Histograms were plotted for the two utility values distribution. Floor effects and  
38  
39 197 ceiling (proportion of patients with the highest and lowest possible scores respectively) were  
40  
41 198 calculated for the EQ-5D-3L and SF-6D. Ceiling and floor effects were considered small if  
42  
43 199  $\leq 15\%$  of patients occupy the best or worst health states, but they were considered serious if  
44  
45 200  $> 15\%$  of patients occupy these states (36).

46 201  
47 202 Currently, an established methodology to compare different MAUIs is not available. Thus,  
48  
49 203 recently published methodologies, which compared different MAUIs, were followed in the  
50  
51 204 current study (19, 23, 35). This included a combination of statistical and psychometric  
52  
53 205 analyses to examine discrimination, agreement, differences and correlation between the two  
54  
55 206 instruments.

56 207  
57 208 **Agreement and differences**  
58  
59 209 The Wilcoxon Signed-Ranks Test was used to assess the overall difference between the EQ-5D-  
60  
210 3L and SF-6D utility scores and the difference of the utility scores according to different  
211  
socio-demographic and disease related features. Furthermore, the distribution of the

1 212 responses to the different domains of the two instruments was tabulated to present the  
2 213 agreement and the differences between the two instruments. Bland-Altman plot was also  
3 214 used to assess the proportional error and the limit of agreement (37).  
4  
5  
6  
7

215

### 216 ***Intra Class Correlation (ICC)***

217 The dimensions of the two instruments were compared using ICC. The related dimensions  
218 between the two MAUIs are role limitation (SF-6D)/usual activities (EQ-5D-3L), physical  
219 functioning (SF-6D)/mobility and self-care (EQ-5D-3L), pain (SF-6D)/pain and discomfort  
220 (EQ-5D-3L), social functioning (SF-6D)/usual activities (EQ-5D-3L) and mental health (SF-  
221 6D)/anxiety and depression (EQ-5D-3L). The vitality dimension of the SF-6D did not have  
222 any related dimension with the EQ-5D-3L. The magnitude of the correlation coefficients  
223 were interpreted according to Guilford's criteria (38).  
224

225

### 225 ***Discrimination***

226 It is important that MAUIs can discriminate correctly among groups of different severity as  
227 MAUIs are meant to measure change in QOL due to improvement or worsening of the health,  
228 in the condition of interest.  
229

230

230 Glomerular Filtration Rate (GFR) is the most important indicator of kidney function of  
231 patients with CKD (39). Studies have shown that decreased GFR is associated with infection,  
232 impaired cognitive and physical function as well as threats to patient safety (40). Though  
233 classifications exist to classify stages of CKD, it is evident that at present most of the clinical  
234 decision making in CKD is solely based on GFR base classification (41, 42). Depending on  
235 the GFR value, CKD is categorised into five stages; stage I to stage V. For analytical  
236 purposes, the CKD stages I to III were categorised as "early stage" in the present study. It is  
237 expected that with advanced stages of the disease, the utility scores should be lower than the  
238 early stages.  
239

240

240 Discrimination of EQ-5D-3L and SF-6D for different CKD stages was examined using the  
241 non-parametric test, Kruskal-Wallis, and effect size. The instrument's ability to discriminate  
242 between two adjacent stages was estimated by calculating the effect size. The effect size was  
243 calculated by dividing the mean difference of two adjacent CKD stages by the standard  
244 deviation of the milder of the two CKD stages (23, 43). Large effect size indicates better  
245 discriminating ability of the instrument. The effect size was categorised into small (0.2-0.5),  
246 medium (0.5-0.8) and large (more than 0.8) (44).  
247

### 248 ***Test-retest reliability***

249 To assess the test-retest reliability of the study instrument, within a period of one week, 30  
250 randomly selected study participants were visited at their households by the data collectors.  
251 Test re-test reliability of the utility scores of the two instruments was assessed using ICC and  
252 a value of 0.70 or greater was considered as satisfactory reliability (45).

### 254 ***Patient and Public Involvement***

255 The main stakeholders in the provision of care for the CKD patients such as consultants,  
256 medical officers working in nephrology units, community leaders and the patients living in  
257 this area were involved in planning the study. Their concerns were always entertained and  
258 where feasible their concerns were incorporated into the study. During the data collection,  
259 stage permission was obtained from the respective local officers. The results of the study was  
260 communicated to the local level officials such as Medical Officer of Health, Divisional  
261 Secretariat, Regional Director of Health Services and Provincial Director of Health Services.

## 263 **Results**

### 264 ***Sample characteristics***

265 Out of 1162 participants selected to be included in the study, 66 (5.6%) did not participate in  
266 the study giving a response rate of 94.4%. The mean age of the study population was 58.4  
267 years (Standard Deviation (SD) 10.8). There was a preponderance of males among the study  
268 population (62.6%, N=686). The mean eGFR of the population was 31.8 (SD 20.2)  
269 ml/min/1.73 m<sup>2</sup>. The mean number of years since diagnosed with CKD was found to be 4.1  
270 (SD 3.2) years. The majority of participants was in the later stages, stage 4 or beyond, of  
271 CKD (n=803; 73.2%). 38 participants (3.6%), with stage 5 of the disease and undergoing  
272 dialysis, were on haemodialysis (Table 1). Chronic Kidney Disease of Unknown origin  
273 (CKDu) was the cause of the CKD in most of the study population (n=489; 43.7%).

### 275 ***Distribution of EQ-5D-3L and SF-6D utility scores***

276 The mean EQ-5D-3L utility score at baseline was 0.540 compared with 0.534 for the SF-6D  
277 as summarised in Table 1. The EQ-5D-3L utility score ranged from -0.594 to 1, while SF-6D  
278 ranged from 0.3 to 0.89. The median baseline values have different locations in their  
279 respective scoring ranges (Fig 1). The EQ-5D-3L showed 1.0% floor effect and 11.8% ceiling  
280 effect, while SF-6D had 0.0% floor and ceiling effects.

### 282 ***Agreement, differences and correlation between the two utility scores***

283 Analyses revealed non- normal distribution of the utility scores of both the instruments, thus  
284 Wilcoxon Signed-Ranks test was used to compare the two utility scores. There was significant

1 285 difference ( $p < 0.001$ ) between overall scores of the two utility instruments. Further the two  
2 286 utility scores were significantly different among males ( $< 0.001$ ), age more than 40 years  
3 287 groups, those who were employed, among both who had and didn't have comorbidities, up to  
4 288 stage IV of CKD and among dialysis patients (Table 1). The standard deviation of the EQ-  
5 289 5D-3L was considerably larger than that of the SF-6D among all sub groups.

6 290  
7  
8 291 Significant proportion of the patients reported "no problem" in any of the EQ-5D-3L  
9 292 dimensions than the SF-6D. However, fewer patients reported "extreme problems" in the EQ-  
10 293 5D-3L than in the SF-6D (Tables 2 and 3). Patients reported different results for the related  
11 294 dimensions of the two MAUIs (Tables 2 and 3). Nearly half of the patients reported "no  
12 295 problem" in Mobility domain of the EQ-5D-3L, while only 0.7% reported "no problems"  
13 296 with the physical functioning of the SF-6D. Nearly quarter (23.8%) of patients reported "no  
14 297 problems" for the anxiety / depression dimension in the EQ-5D-3L, whereas only 0.6%  
15 298 reported the same for the mental health dimension of the SF-6D.

16 299  
17 300 The correlation between EQ-5D-3L and SF-6D was 0.408, which was statistically significant  
18 301 at  $p < 0.001$  level (Figure 2). Regarding the ICC between different domains of the two  
19 302 instruments, according to the Guilford's criteria, moderate correlation (0.4-0.6) was evident  
20 303 between Social functioning and Mobility (0.517), Social functioning and Self-care (0.424),  
21 304 Social functioning and Usual activities (0.464), Social functioning and Pain/discomfort  
22 305 (0.566), Social functioning and Anxiety/depression (0.528), Pain and Mobility (0.475), Pain  
23 306 and Pain/ discomfort (0.482), Pain and Anxiety/depression (0.484), Vitality and Pain/  
24 307 discomfort (0.475) and Vitality and Anxiety/depression (0.453) (Table 4). The Bland-Altman  
25 308 plot showed proportional error and wide limits of agreement (Figure 3).

26 309  
27 310 **Discrimination**  
28 311 With both MAUIs, utility scores decreased with increasing severity (as measured by CKD  
29 312 stage) (Table 5). In both MAUIs, the utility differences across CKD stages were statistically  
30 313 significant ( $p < 0.05$ ) indicating good discrimination. Figure 4 indicated the box-plots present  
31 314 the median, quartiles and extreme values for the EQ-5D-3L and SF-6D utility scores for CKD  
32 315 stage. Furthermore, the calculated effect size between CKD early stage and stage IV was  
33 316 0.071 and 0.141 for EQ-5D-3L and SF-6D respectively. The highest effect size was observed  
34 317 between CKD stage V and dialysis group, which was 0.807 for EQ-5D-3L and 1.098 for SF-  
35 318 6D.

36 319  
37 320 **Test-retest reliability**

1 321 The test re-test ICC was 0.943 in EQ-5D-3L while it was 0.921 in SF 6D, indicating good test  
2  
3 322 re-test reliability in both the instruments.  
4  
5 323

## 6 324 **Discussion**

8 325 This is the first study to compare the utility scores arising from the EQ-5D-3L and SF-6D in  
9  
10 326 CKD patients. According to the current study, the correlation between the scores was  
11  
12 327 moderate. Both tools were able to discriminate advancement of CKD stages. Effect size,  
13  
14 328 which denoted the discriminating ability of different CKD stages, is highest when disease  
15  
16 329 condition is advanced and the highest effect size was seen in SF-6D. Further, the lowest  
17  
18 330 ceiling effect and the floor effect were seen in SF 6D.  
19

20 331  
21 332 Evidence indicate that the choice of MAUI (e.g.; EQ 5D or SF6D) has an impact on the  
22  
23 333 results of the cost-utility analysis (46, 47). Sack et al. (2009) compared the results of cost-  
24  
25 334 utility estimates using both EQ 5D and SF 6D. Results indicated contrasting results for the  
26  
27 335 two instruments and authors concluded that the choice of the instrument does matter in cost-  
28  
29 336 utility analysis (46). Thus, from an economic perspective it is important to know the most  
30  
31 337 suitable MAUI to be used among CKD patients.  
32

33 338  
34 339 At present, there is no consensus on the methodology to compare the utility scores of  
35  
36 340 different MAUIs (19, 35). The present study adopted the methodologies used by Kularatna et  
37  
38 341 al. (2017) and Lamers et al. (2006) (19, 35). Only one time assessment of the utilities was  
39  
40 342 done in the present study. Thus, the responsiveness of the two instruments to changes in  
41  
42 343 kidney function over time was not assessed. Though Sri Lankan EQ-5D-3L utility scores are  
43  
44 344 available (18), yet we used the UK utility scores for the EQ-5D-3L (33) because of the  
45  
46 345 unavailability of comparable Sri Lankan SF-6D utility scores values. This is an accepted  
47  
48 346 method of calculating the utility scores in the absence of country specific utilities. Two  
49  
50 347 studies conducted in Netherlands (24) and Italy (21), comparing the utility scores of the two  
51  
52 348 instruments, had used the UK derived EQ-5D-3L and SF-6D utility scores.  
53

54 349  
55 350 The present study did not find any difference ( $p=0.588$ ) between the overall mean scores of  
56  
57 351 the two utility instruments. This was similar to a study conducted among a group of  
58  
59 352 HIV/AIDS patients (28), but different from other studies available in the literature where  
60  
353 different results have been reported. Significantly higher utility values for EQ-5D-3L were  
354  
355 found among general population (29, 48), cardio-vascular disease patients (19), rheumatoid  
356  
arthritis patients (21) and patients with stable angina (16). However, in a study conducted  
among a group of patients with psychiatric disorders, significantly higher utility values were



1 357 obtained for SF-6D instrument (24). These varying results could be due to different recall  
2 358 periods of the two instruments. EQ-5D-3L assessed the health status of the day of instrument  
3 359 administration while SF-6D, which was derived from SF-36, assessed the health status of the  
4 360 past 30 days.

5 361  
6 362 Though overall ceiling and floor effects of both instruments were small, relatively higher  
7 363 ceiling effect was evident in the EQ-5D-3L. This was consistent with several other studies  
8 364 conducted elsewhere, where EQ 5D 3L reported a relatively higher ceiling effect compared to  
9 365 SF 6D (16, 19, 49-51). This is mainly due to the fact that the EQ-5D-3L has limited response  
10 366 levels and the five level newer version of EQ-5D-3L expected to improve the properties of  
11 367 the three-level in terms of reduced ceiling effects, increased reliability and improved ability  
12 368 to discriminate between different levels of health (52). Further, the current study reported  
13 369 relatively lower ceiling effect, for the EQ 5D, compared to results obtained among  
14 370 Parkinson's disease (13.5%) and stable angina (15.5%) patients. However, our result was  
15 371 higher compared to the ceiling effect observed among patients with systemic sclerosis  
16 372 (7.0%). Among many other factors that could contribute to these differences, the level of  
17 373 morbidity of a disease is said to be one of the factors which could influence the ceiling effect  
18 374 observed in EQ 5D (53). Thus the diseases with lower morbidity are expected to have higher  
19 375 ceiling effects.

20 376  
21 377 Discrimination of EQ-5D-3L and SF-6D for different CKD stages was examined using  
22 378 ANOVA and effect size. In both MAUIs, the utility differences across CKD stages were  
23 379 statistically significant ( $p < 0.05$ ; ANOVA) indicating good discrimination. However, the  
24 380 effect size was small for both the tools until the dialysis stage. At the dialysis stage, the effect  
25 381 size is large and this was highest in the SF-6D instrument. It could be because CKD is  
26 382 considered asymptomatic until the later stages of the disease (54, 55), not allowing the  
27 383 instruments to discriminate the different stages. According to a recent study conducted by  
28 384 Jesky et al. (2016), the EQ-5D-3L utility scores of the adjacent pre-dialysis CKD stages were  
29 385 not found to be statistically significant (56).

30 386

### 31 387 **Limitations**

32 388 Some of the information related to QOL in SF-36 is considered to be sensitive in nature and  
33 389 the fact that this information was obtained utilising an interviewer-administered questionnaire  
34 390 could have led to some under-reporting in the assessment of QOL though many measures  
35 391 were taken to minimize this issue. Our study was a cross-sectional study, thus we could not  
36 392 assess how utility scores of the two instruments change over time.



1 393

2  
3 394 **Conclusions**

4  
5 395 The correlation between the scores was moderate. Both tools were able to discriminate  
6 396 advancement of CKD stages. Effect size, which denoted the discriminating ability of the  
7  
8 397 different CKD stages, is highest when disease condition is advanced. Findings indicate that  
9  
10 398 both tools cover different aspects of health. Thus, although there was a moderate correlation  
11  
12 399 between the measures, both scores cannot be used interchangeably while assessing QALY  
13  
14 400 during cost utility analysis. Finally, SF 6D had the lowest floor and ceiling effect, and was  
15  
16 401 better at detecting different stages of the disease. Thus based on the evidence presented in  
17  
18 402 this study, SF 6D appears to be more appropriate to be used among CKD patients.

19 403

20 404 **Ethics approval and consent to participate**

21  
22 405 The study is in accordance with Helsinki Declaration. The study protocol has been approved  
23  
24 406 by the Ethics Committee of Colombo Medical Faculty. Permission was obtained from the  
25  
26 407 Provincial Director of Health Service, to assess the CKD register available at his office.  
27  
28 408 Participants gave their informed consent.

29 409

30 410 **Acknowledgement:**

31  
32 411 Authors acknowledge Asanga Ranasinghe, Priyantha Kumara and Anura Ranasinghe for the  
33  
34 412 support rendered during the study.

35 413

36 414 **Funding**

37  
38 415 This study was funded by the Ministry of Health, Sri Lanka

39 416

40  
41 417 **Competing interests:** None declared.

42 418

43  
44 419 **Patient consent :** Obtained.

45 420

46 421 **Author Contributions**

47  
48 422 SK and SS : Research idea, study design, statistical analysis and drafting of the manuscript.  
49  
50 423 NG<sup>2</sup>: study design, data analysis/interpretation. NG<sup>1</sup>: participated in study design, data  
51  
52 424 interpretation and supervision. All authors read and approved the final manuscript.

53  
54 425 *Provenance and peer review :* Not commissioned; externally peer reviewed.

55 426

56 427 **Data sharing statement**

1 428 The datasets used and/or analysed during the current study available from the corresponding  
2  
3 429 author on reasonable request.  
4

5 430

6 431 **Figure legend**

7  
8 432 Fig. 1. Distribution of EQ-5D-3L (A) and SF-6D (B)

9  
10 433 Fig. 2 Correlation between the EQ-5D-3L and the SF-6D utilities

11  
12 434 Fig. 3 : Bland and Altman plot of differences between EQ-5D-3L and SF-6D for patients with  
13 435 CKD

14  
15 436 Fig 4: The box-plots present the median, quartiles and extreme values for the EQ-5D-3L and  
16 437 SF-6D utility scores for CKD stage

17  
18 438  
19  
20  
21  
22  
23  
24  
25  
26  
27  
28  
29  
30  
31  
32  
33  
34  
35  
36  
37  
38  
39  
40  
41  
42  
43  
44  
45  
46  
47  
48  
49  
50  
51  
52  
53  
54  
55  
56  
57  
58  
59  
60

439 **References**

- 440 1. Senanayake S, Gunawardena N, Paliyawadana P, Kularatna S, Peiris T. Validity and reliability  
441 of the Sri Lankan version of the kidney disease quality of life questionnaire (KDQOL-SF™). Health and  
442 quality of life outcomes. 2017;15(1):119.
- 443 2. Schieppati A, Remuzzi G. Chronic renal diseases as a public health problem: epidemiology,  
444 social, and economic implications. *Kidney International*. 2005;68:S7-S10.
- 445 3. Evaluation of the Global Burden of Disease 2010 Arrow Diagram: Institute for Health Metrics  
446 and Evaluation; 2010 [Available from: <http://vizhub.healthdata.org/irank/arrow.php>].
- 447 4. Rebollo-Rubio A, Morales-Asencio JM, Pons-Raventos ME, Mansilla-Francisco JJ. Review of  
448 studies on health related quality of life in patients with advanced chronic kidney disease in Spain.  
449 *Nefrologia*. 2015;35(1):92-109.
- 450 5. Mujais SK, Story K, Brouillette J, Takano T, Soroka S, Franek C, et al. Health-related quality of  
451 life in CKD patients: correlates and evolution over time. *Clinical Journal of the American Society of*  
452 *Nephrology*. 2009;4(8):1293-301.
- 453 6. Tsai Y-C, Hung C-C, Hwang S-J, Wang S-L, Hsiao S-M, Lin M-Y, et al. Quality of life predicts risks  
454 of end-stage renal disease and mortality in patients with chronic kidney disease. *Nephrology dialysis*  
455 *transplantation*. 2009;25(5):1621-6.
- 456 7. DeOreo PB. Hemodialysis patient-assessed functional health status predicts continued  
457 survival, hospitalization, and dialysis-attendance compliance. *American Journal of Kidney Diseases*.  
458 1997;30(2):204-12.
- 459 8. Gussous Y, Theologis AA, Demb JB, Tangtiphaiboontana J, Berven S. Correlation Between  
460 Lumbopelvic and Sagittal Parameters and Health-Related Quality of Life in Adults With Lumbosacral  
461 Spondylolisthesis. *Global spine journal*. 2018;8(1):17-24.
- 462 9. Howren MB. Quality-Adjusted Life Years (QALYs). *Encyclopedia of Behavioral Medicine*:  
463 Springer; 2013. p. 1605-6.
- 464 10. Torrance GW, Feeny D. Utilities and quality-adjusted life years. *International journal of*  
465 *technology assessment in health care*. 1989;5(4):559-75.
- 466 11. Drummond MF, Sculpher MJ, Claxton K, Stoddart GL, Torrance GW. *Methods for the economic*  
467 *evaluation of health care programmes*: Oxford university press; 2015.
- 468 12. Brooks R. EuroQol: the current state of play. *Health policy*. 1996;37(1):53-72.
- 469 13. Brazier J, Roberts J, Deverill M. The estimation of a preference-based measure of health from  
470 the SF-36. *Journal of health economics*. 2002;21(2):271-92.
- 471 14. Feeny D, Furlong W, Torrance GW, Goldsmith CH, Zhu Z, DePauw S, et al. Multiattribute and  
472 single-attribute utility functions for the health utilities index mark 3 system. *Medical care*.  
473 2002;40(2):113-28.
- 474 15. Feeny D, Furlong W, Boyle M, Torrance GW. Multi-attribute health status classification  
475 systems. *Pharmacoeconomics*. 1995;7(6):490-502.
- 476 16. Wu J, Han Y, Zhao F-L, Zhou J, Chen Z, Sun H. Validation and comparison of EuroQoL-5  
477 dimension (EQ-5D) and Short Form-6 dimension (SF-6D) among stable angina patients. *Health and*  
478 *quality of life outcomes*. 2014;12(1):156.
- 479 17. Stolk EA, Oppe M, Scalone L, Krabbe PF. Discrete choice modeling for the quantification of  
480 health states: the case of the EQ-5D. *Value in Health*. 2010;13(8):1005-13.
- 481 18. Kularatna S, Whitty JA, Johnson NW, Jayasinghe R, Scuffham PA. Valuing EQ-5D health states  
482 for Sri Lanka. *Quality of Life Research*. 2015;24(7):1785-93.
- 483 19. Kularatna S, Byrnes J, Chan YK, Ski CF, Carrington M, Thompson D, et al. Comparison of the  
484 EQ-5D-3L and the SF-6D (SF-12) contemporaneous utility scores in patients with cardiovascular  
485 disease. *Quality of Life Research*. 2017;26(12):3399-408.
- 486 20. Herdman M, Gudex C, Lloyd A, Janssen M, Kind P, Parkin D, et al. Development and preliminary  
487 testing of the new five-level version of EQ-5D (EQ-5D-5L). *Quality of life research*. 2011;20(10):1727-  
488 36.
- 489 21. Salaffi F, Carotti M, Ciapetti A, Gasparini S, Grassi W. A comparison of utility measurement  
490 using EQ-5D and SF-6D preference-based generic instruments in patients with rheumatoid arthritis.  
491 *Clinical and experimental rheumatology*. 2011;29(4):661-71.

- 1 492 22. Kwakkenbos L, Fransen J, Vonk MC, Becker ES, Jeurissen M, van den Hoogen FH, et al. A  
2 493 comparison of the measurement properties and estimation of minimal important differences of the  
3 494 EQ-5D and SF-6D utility measures in patients with systemic sclerosis. *Clinical and experimental*  
4 495 *rheumatology*. 2013;31(2 Suppl 76):50-6.
- 5 496 23. Rowen D, Young T, Brazier J, Gaugris S. Comparison of generic, condition-specific, and mapped  
6 497 health state utility values for multiple myeloma cancer. *Value in Health*. 2012;15(8):1059-68.
- 7 498 24. Lamers LM, Bouwmans CA, van Straten A, Donker MC, Hakkaart L. Comparison of EQ-5D and  
8 499 SF-6D utilities in mental health patients. *Health economics*. 2006;15(11):1229-36.
- 9 500 25. Barton GR, Bankart J, Davis AC. A comparison of the quality of life of hearing-impaired people  
10 501 as estimated by three different utility measures Un comparación de la calidad de vida de personas con  
11 502 trastornos auditivos estimada por tres diferentes medidas de utilidad. *International Journal of*  
12 503 *Audiology*. 2005;44(3):157-63.
- 13 504 26. Barton GR, Bankart J, Davis AC, Summerfield QA. Comparing utility scores before and after  
14 505 hearing-aid provision. *Applied health economics and health policy*. 2004;3(2):103-5.
- 15 506 27. van Stel HF, Buskens E. Comparison of the SF-6D and the EQ-5D in patients with coronary heart  
16 507 disease. *Health and Quality of Life Outcomes*. 2006;4(1):20.
- 17 508 28. Stavem K, Frøland SS, Hellum KB. Comparison of preference-based utilities of the 15D, EQ-5D  
18 509 and SF-6D in patients with HIV/AIDS. *Quality of Life Research*. 2005;14(4):971-80.
- 19 510 29. Petrou S, Hockley C. An investigation into the empirical validity of the EQ-5D and SF-6D based  
20 511 on hypothetical preferences in a general population. *Health economics*. 2005;14(11):1169-89.
- 21 512 30. McDonough CM, Tosteson AN. Measuring preferences for cost-utility analysis.  
22 513 *Pharmacoeconomics*. 2007;25(2):93-106.
- 23 514 31. Lwanga SK, Lemeshow S, Organization WH. Sample size determination in health studies: a  
24 515 practical manual. 1991.
- 25 516 32. Senanayake S, Gunawardena N, Paliyawadana P, Bandara P, Haniffa R, Karunaratna R, et al.  
26 517 Symptom burden in chronic kidney disease; a population based cross sectional study. *BMC*  
27 518 *nephrology*. 2017;18(1):228.
- 28 519 33. Dolan P. Modeling valuations for EuroQol health states. *Medical care*. 1997;35(11):1095-108.
- 29 520 34. Ramos-Goni JM, Rivero-Arias O. eq5d: A command to calculate index values for the EQ-5D  
30 521 quality-of-life instrument. *Stata Journal*. 2011;11(1):120.
- 31 522 35. Lamers L, Bouwmans C, van Straten A, Donker M, Hakkaart L. Comparison of EQ-5D and SF-6D  
32 523 utilities in mental health patients. *Health economics*. 2006;15(11):1229-36.
- 33 524 36. Harrison M, Davies L, Bansback N, McCoy M, Verstappen S, Watson K, et al. The comparative  
34 525 responsiveness of the EQ-5D and SF-6D to change in patients with inflammatory arthritis. *Quality of*  
35 526 *Life Research*. 2009;18(9):1195.
- 36 527 37. Bland JM, Altman D. Statistical methods for assessing agreement between two methods of  
37 528 clinical measurement. *The lancet*. 1986;327(8476):307-10.
- 38 529 38. Tredoux C, Durrheim K. Numbers, hypotheses and conclusions: A course in statistics for the  
39 530 social sciences. Cape Town: University of Cape Town Press[Links]. 2002.
- 40 531 39. Levey AS, Stevens LA, Coresh J. Conceptual model of CKD: applications and implications.  
41 532 *American journal of kidney diseases*. 2009;53(3):S4-S16.
- 42 533 40. Seliger SL, Zhan M, Walker LD, Fink JC. Chronic kidney disease adversely influences patient  
43 534 safety. *Journal of the American Society of Nephrology*. 2008;19(12):2414-9.
- 44 535 41. Stevens PE, Levin A. Evaluation and management of chronic kidney disease: synopsis of the  
45 536 kidney disease: improving global outcomes 2012 clinical practice guideline. *Annals of internal*  
46 537 *medicine*. 2013;158(11):825-30.
- 47 538 42. Tseng C-L, Lafrance J-P, Lu S-E, Soroka O, Miller DR, Maney M, et al. Variability in estimated  
48 539 glomerular filtration rate values is a risk factor in chronic kidney disease progression among patients  
49 540 with diabetes. *BMC nephrology*. 2015;16(1):34.
- 50 541 43. Kularatna S, Byrnes J, Chan YK, Ski CF, Carrington M, Thompson D, et al. Comparison of the  
51 542 EQ-5D-3L and the SF-6D (SF-12) contemporaneous utility scores in patients with cardiovascular  
52 543 disease. *Quality of life research : an international journal of quality of life aspects of treatment, care*  
53 544 *and rehabilitation*. 2017;26(12):3399-408.
- 54 545 44. Cohen J. A power primer. *Psychological bulletin*. 1992;112(1):155.
- 55 546 45. Litwin MS, Fink A. How to measure survey reliability and validity: Sage; 1995.

- 1 547 46. Sack TH, Barton GR, Jenkinson C, Doherty M, Avery AJ, Muir KR. Comparing cost-utility  
2 548 estimates: does the choice of EQ-5D or SF-6D matter? *Med Care*. 2009;889-95.
- 3 549 47. Grieve R, Grishchenko M, Cairns J. SF-6D versus EQ-5D: reasons for differences in utility scores  
4 550 and impact on reported cost-utility. *The European journal of health economics*. 2009;10(1):15-23.
- 5 551 48. Stewart ST, Cutler DM, Rosen AB. Comparison of Trends in US Health-Related Quality of Life  
6 552 over the 2000's Using the SF-6D, HALex, EQ-5D, and EQ-5D Visual Analog Scale versus a Broader Set  
7 553 of Symptoms and Impairments. *Medical care*. 2014;52(12):1010.
- 8 554 49. Zhao FJ, Yue M, Yang H, Wang T, Wu Jh, Li SC. Validation and comparison of EuroQol and short  
9 555 form 6D in chronic prostatitis patients. *Value in Health*. 2010;13(5):649-56.
- 10 556 50. Cunillera O, Tresserras R, Rajmil L, Vilagut G, Brugulat P, Herdman M, et al. Discriminative  
11 557 capacity of the EQ-5D, SF-6D, and SF-12 as measures of health status in population health survey.  
12 558 *Quality of Life Research*. 2010;19(6):853-64.
- 13 559 51. Bharmal M, Thomas J. Comparing the EQ-5D and the SF-6D descriptive systems to assess their  
14 560 ceiling effects in the US general population. *Value in Health*. 2006;9(4):262-71.
- 15 561 52. Janssen M, Pickard AS, Golicki D, Gudex C, Niewada M, Scalone L, et al. Measurement  
16 562 properties of the EQ-5D-5L compared to the EQ-5D-3L across eight patient groups: a multi-country  
17 563 study. *Quality of Life Research*. 2013;22(7):1717-27.
- 18 564 53. Bharmal M, Thomas III J. Comparing the EQ-5D and the SF-6D descriptive systems to assess  
19 565 their ceiling effects in the US general population. *Value Health*. 2006;9(4):262-71.
- 20 566 54. de Boer IH, Olan GA, Patel UD. Screening for chronic kidney disease. *Ann Intern Med*.  
21 567 2013;158(5 Pt 1):362-3.
- 22 568 55. Hummel A. Chronic renal failure, a frequent and asymptomatic pathology. *Soins; la revue de*  
23 569 *reference infirmiere*. 2010(745):24-6.
- 24 570 56. Jesky MD, Dutton M, Dasgupta I, Yadav P, Ng KP, Fenton A, et al. Health-related quality of life  
25 571 impacts mortality but not progression to end-stage renal disease in pre-dialysis chronic kidney disease:  
26 572 a prospective observational study. *PloS one*. 2016;11(11):e0165675.
- 27  
28  
29  
30  
31  
32  
33  
34  
35  
36  
37  
38  
39  
40  
41  
42  
43  
44  
45  
46  
47  
48  
49  
50  
51  
52  
53  
54  
55  
56  
57  
58  
59  
60

575 **Tables**

576

577 **Table 1 : Demographic distribution of the sample by the EQ-5D-3L and the SF-6D utility**  
578 **scores**

| Variable            | N (%)      | EQ-5D-3L utility mean (SD) | Sf-6D utility mean (SD) | p value <sup>#</sup> |
|---------------------|------------|----------------------------|-------------------------|----------------------|
| All sample          | 1096       | 0.540 (0.35)               | 0.534 (0.09)            | <0.001*              |
| Sex                 |            |                            |                         |                      |
| Male                | 686 (62.6) | 0.561 (0.34)               | 0.532 (0.10)            | <0.001*              |
| Female              | 410 (37.4) | 0.505 (0.37)               | 0.539 (0.09)            | 0.342                |
| Age (years)         |            |                            |                         |                      |
| Less than 20        | 07 (0.6)   | 0.570 (0.44)               | 0.455 (0.09)            | 0.235                |
| 20-40               | 45 (4.1)   | 0.591 (0.34)               | 0.536 (0.09)            | 0.103                |
| 41-60               | 562 (51.3) | 0.555 (0.35)               | 0.540 (0.10)            | <0.001*              |
| More than 60        | 482 (44.0) | 0.517 (0.35)               | 0.529 (0.08)            | 0.006*               |
| Education status    |            |                            |                         |                      |
| No formal education | 81 (7.4)   | 0.448 (0.42)               | 0.508 (0.09)            | 0.441                |
| 5 Grade             | 413 (37.7) | 0.529 (0.35)               | 0.536 (0.09)            | 0.001*               |
| 6-11 Grade          | 377 (34.4) | 0.556 (0.34)               | 0.533 (0.10)            | <0.001*              |
| GCE O/L passed      | 190 (17.3) | 0.554 (0.34)               | 0.540 (0.09)            | 0.007*               |
| GCE A/L passed      | 35 (3.2)   | 0.618 (0.34)               | 0.540 (0.09)            | 0.225                |
| Employment status   |            |                            |                         |                      |
| Employed            | 380 (34.7) | 0.675 (0.25)               | 0.547 (0.10)            | <0.001*              |
| Not employed        | 716 (65.3) | 0.468 (0.37)               | 0.528 (0.09)            | 0.417                |
| Comorbidities       |            |                            |                         |                      |
| Present             | 778 (71.0) | 0.505 (0.36)               | 0.532 (0.09)            | 0.037*               |
| Absent              | 318 (29.0) | 0.625 (0.29)               | 0.542 (0.10)            | <0.001*              |
| CKD stage           |            |                            |                         |                      |
| Early stage         | 254 (24.0) | 0.588 (0.30)               | 0.551 (0.10)            | <0.001*              |
| Stage IV            | 614 (58.1) | 0.566 (0.42)               | 0.536 (0.09)            | <0.001*              |
| Stage V             | 151 (14.3) | 0.467 (0.42)               | 0.523 (0.08)            | 0.808                |
| Dialysis            | 38 (3.6)   | 0.126 (0.39)               | 0.432 (0.07)            | <0.001*              |

579 <sup>#</sup> Wilcoxon signed-rank test ; \* Significant at p<0.05

580

581 **Table 2 : Distribution of the sample by the EQ-5D-3L dimensions**

|                 | Mobility (%) | Self-care (%) | Usual activities (%) | Pain/discomfort (%) | Anxiety/depression (%) |
|-----------------|--------------|---------------|----------------------|---------------------|------------------------|
| No problem      | 515 (47.0)   | 644 (58.8)    | 473 (43.2)           | 182 (16.6)          | 261 (23.8)             |
| Some problem    | 559 (51.0)   | 421 (38.4)    | 587 (53.6)           | 739 (67.4)          | 680 (62.0)             |
| Extreme problem | 22 (2.0)     | 31 (2.8)      | 36 (3.3)             | 175 (16.0)          | 155 (14.1)             |

582

583

584 **Table 3 : Distribution of the sample by the SF-6D dimensions**

|                | Physical functioning (%) | Role limitation (%) | Social functioning (%) | Pain (%)   | Mental health (%) | Vitality (%) |
|----------------|--------------------------|---------------------|------------------------|------------|-------------------|--------------|
| 1 <sup>a</sup> | 8 (0.7)                  | 173 (15.8)          | 17 (1.6)               | 7 (0.6)    | 6 (0.6)           | 2 (0.2)      |
| 2              | 22 (2.0)                 | 5 (0.5)             | 60 (5.5)               | 5 (0.5)    | 130 (11.9)        | 194 (17.7)   |
| 3              | 304 (27.7)               | 135 (12.3)          | 482 (44.0)             | 59 (5.4)   | 582 (53.1)        | 498 (45.4)   |
| 4              | 356 (32.5)               | 783 (71.4)          | 481 (43.9)             | 452 (41.2) | 364 (33.2)        | 287 (26.2)   |
| 5              | 87 (7.9)                 | NA                  | 56(5.1)                | 333 (30.4) | 14 (1.3)          | 115 (10.5)   |
| 6 <sup>b</sup> | 319 (29.1)               | NA                  | NA                     | 240 (21.9) | NA                | NA           |

585 <sup>a</sup> No problems586 <sup>b</sup> Severe problems

587

588



1 589

2 3 4 590 **Table 4 : Intra Class Correlation between the EQ-5D-3L and the SF-6D**

|                      | Mobility | Self-care | Usual activities | Pain/discomfort | Anxiety/depression |
|----------------------|----------|-----------|------------------|-----------------|--------------------|
| Physical functioning | 0.381*   | 0.326*    | 0.296*           | 0.382*          | 0.381*             |
| Role limitation      | 0.023    | -0.003    | -0.104           | 0.016           | 0.138*             |
| Social functioning   | 0.517*   | 0.424*    | 0.464*           | 0.566*          | 0.528*             |
| Pain                 | 0.475*   | 0.330*    | 0.355*           | 0.482*          | 0.484*             |
| Mental health        | 0.293*   | 0.323*    | 0.295*           | 0.240*          | 0.244*             |
| Vitality             | 0.322*   | 0.148*    | 0.255*           | 0.475*          | 0.453*             |

22 591 \* Significant at p&lt;0.05 level

23 592

24 593

25 26 27 594 **Table 5 : Discrimination across clinical severity groups**

| CKD stage   | EQ-5D-3L      |                 |        |        |       | SF-6D         |                 |        |        |       |
|-------------|---------------|-----------------|--------|--------|-------|---------------|-----------------|--------|--------|-------|
|             | N             | Mean (SD)       | Median | Sig#   | ES    | N             | Mean (SD)       | Median | Sig#   | ES    |
| Early stage | 254<br>(24.0) | 0.588<br>(0.30) | 0.656  | <0.001 | 0.071 | 254<br>(24.0) | 0.551<br>(0.10) | 0.570  | <0.001 | 0.141 |
| IV          | 614<br>(58.1) | 0.566<br>(0.42) | 0.620  |        |       | 614<br>(58.1) | 0.536<br>(0.09) | 0.560  |        |       |
| V           | 151<br>(14.3) | 0.467<br>(0.42) | 0.585  |        |       | 151<br>(14.3) | 0.523<br>(0.08) | 0.550  |        |       |
| Dialysis    | 38<br>(3.6)   | 0.126<br>(0.39) | -0.016 |        |       | 38<br>(3.6)   | 0.432<br>(0.07) | 0.410  |        |       |

28 29 30 31 32 33 34 35 36 37 38 39 40 41 42 43 44 45 46 47 48 49 50 51 52 53 54 55 56 57 58 59 60 595 # Kruskal–Wallis test



1  
2  
3  
4  
5  
6  
7  
8  
9  
10  
11  
12  
13  
14  
15  
16  
17  
18  
19  
20  
21  
22  
23  
24  
25  
26  
27  
28  
29  
30  
31  
32  
33  
34  
35  
36  
37  
38  
39  
40  
41  
42  
43  
44  
45  
46  
47  
48  
49  
50  
51  
52  
53  
54  
55  
56  
57  
58  
59  
60



Fig. 1. Distribution of EQ-5D (A) and SF-6D (B)

1  
2  
3  
4  
5  
6  
7  
8  
9  
10  
11  
12  
13  
14  
15  
16  
17  
18  
19  
20  
21  
22  
23  
24  
25  
26  
27  
28  
29  
30  
31  
32  
33  
34  
35  
36  
37  
38  
39  
40  
41  
42  
43  
44  
45  
46  
47  
48  
49  
50  
51  
52  
53  
54  
55  
56  
57  
58  
59  
60



Fig. 2 Correlation between the EQ-5D-3L and the SF-6D utilities

137x99mm (300 x 300 DPI)

1  
2  
3  
4  
5  
6  
7  
8  
9  
10  
11  
12  
13  
14  
15  
16  
17  
18  
19  
20  
21  
22  
23  
24  
25  
26  
27  
28  
29  
30  
31  
32  
33  
34  
35  
36  
37  
38  
39  
40  
41  
42  
43  
44  
45  
46  
47  
48  
49  
50  
51  
52  
53  
54  
55  
56  
57  
58  
59  
60

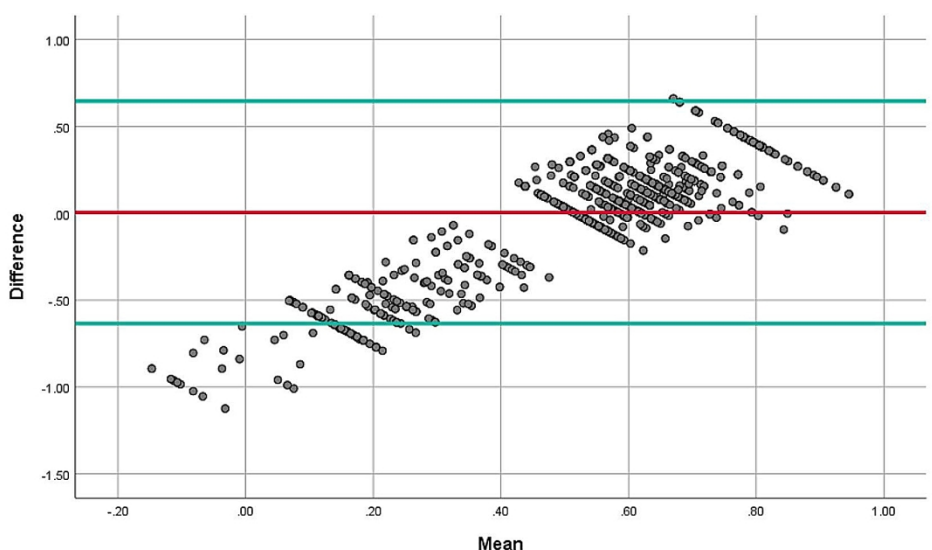

Fig. 3 : Bland and Altman plot of differences between EQ-5D and SF-6D for patients with CKD  
166x90mm (300 x 300 DPI)



Fig 4: The box-plots present the median, quartiles and extreme values for the EQ-5D and SF-6D utility scores for CKD stage

137x99mm (300 x 300 DPI)

STROBE Statement—Checklist of items that should be included in reports of *cross-sectional studies*

|                              | Item No | Recommendation                                                                                                                                                                                    | Line number |
|------------------------------|---------|---------------------------------------------------------------------------------------------------------------------------------------------------------------------------------------------------|-------------|
| <b>Title and abstract</b>    | 1       | (a) Indicate the study's design with a commonly used term in the title or the abstract                                                                                                            | 1           |
|                              |         | (b) Provide in the abstract an informative and balanced summary of what was done and what was found                                                                                               | 16          |
| <b>Introduction</b>          |         |                                                                                                                                                                                                   |             |
| Background/rationale         | 2       | Explain the scientific background and rationale for the investigation being reported                                                                                                              | 67          |
| Objectives                   | 3       | State specific objectives, including any prespecified hypotheses                                                                                                                                  | 115         |
| <b>Methods</b>               |         |                                                                                                                                                                                                   |             |
| Study design                 | 4       | Present key elements of study design early in the paper                                                                                                                                           | 121         |
| Setting                      | 5       | Describe the setting, locations, and relevant dates, including periods of recruitment, exposure, follow-up, and data collection                                                                   | 121-126     |
| Participants                 | 6       | (a) Give the eligibility criteria, and the sources and methods of selection of participants                                                                                                       | 129-134     |
| Variables                    | 7       | Clearly define all outcomes, exposures, predictors, potential confounders, and effect modifiers. Give diagnostic criteria, if applicable                                                          | 157-190     |
| Data sources/<br>measurement | 8*      | For each variable of interest, give sources of data and details of methods of assessment (measurement). Describe comparability of assessment methods if there is more than one group              | 157-190     |
| Bias                         | 9       | Describe any efforts to address potential sources of bias                                                                                                                                         | NA          |
| Study size                   | 10      | Explain how the study size was arrived at                                                                                                                                                         | 123         |
| Quantitative variables       | 11      | Explain how quantitative variables were handled in the analyses. If applicable, describe which groupings were chosen and why                                                                      | 157-190     |
| Statistical methods          | 12      | (a) Describe all statistical methods, including those used to control for confounding                                                                                                             | 193-207     |
|                              |         | (b) Describe any methods used to examine subgroups and interactions                                                                                                                               | NA          |
|                              |         | (c) Explain how missing data were addressed                                                                                                                                                       | NA          |
|                              |         | (d) If applicable, describe analytical methods taking account of sampling strategy                                                                                                                | NA          |
|                              |         | (e) Describe any sensitivity analyses                                                                                                                                                             | NA          |
| <b>Results</b>               |         |                                                                                                                                                                                                   |             |
| Participants                 | 13*     | (a) Report numbers of individuals at each stage of study—eg numbers potentially eligible, examined for eligibility, confirmed eligible, included in the study, completing follow-up, and analysed | 266-267     |
|                              |         | (b) Give reasons for non-participation at each stage                                                                                                                                              | 267         |
|                              |         | (c) Consider use of a flow diagram                                                                                                                                                                | NA          |
| Descriptive data             | 14*     | (a) Give characteristics of study participants (eg demographic, clinical, social) and information on exposures and potential confounders                                                          | 266 - 274   |
|                              |         | (b) Indicate number of participants with missing data for each variable of interest                                                                                                               | NA          |

|                          |     |                                                                                                                                                                                                              |           |
|--------------------------|-----|--------------------------------------------------------------------------------------------------------------------------------------------------------------------------------------------------------------|-----------|
| Outcome data             | 15* | Report numbers of outcome events or summary measures                                                                                                                                                         | NA        |
| Main results             | 16  | (a) Give unadjusted estimates and, if applicable, confounder-adjusted estimates and their precision (eg, 95% confidence interval). Make clear which confounders were adjusted for and why they were included | NA        |
|                          |     | (b) Report category boundaries when continuous variables were categorized                                                                                                                                    | Table 1   |
|                          |     | (c) If relevant, consider translating estimates of relative risk into absolute risk for a meaningful time period                                                                                             | NA        |
| Other analyses           | 17  | Report other analyses done—eg analyses of subgroups and interactions, and sensitivity analyses                                                                                                               | NA        |
| <b>Discussion</b>        |     |                                                                                                                                                                                                              |           |
| Key results              | 18  | Summarise key results with reference to study objectives                                                                                                                                                     | 335 - 340 |
| Limitations              | 19  | Discuss limitations of the study, taking into account sources of potential bias or imprecision. Discuss both direction and magnitude of any potential bias                                                   | 397       |
| Interpretation           | 20  | Give a cautious overall interpretation of results considering objectives, limitations, multiplicity of analyses, results from similar studies, and other relevant evidence                                   | 405 - 413 |
| Generalisability         | 21  | Discuss the generalisability (external validity) of the study results                                                                                                                                        | 410 - 413 |
| <b>Other information</b> |     |                                                                                                                                                                                                              |           |
| Funding                  | 22  | Give the source of funding and the role of the funders for the present study and, if applicable, for the original study on which the present article is based                                                | 425       |

\*Give information separately for exposed and unexposed groups.

**Note:** An Explanation and Elaboration article discusses each checklist item and gives methodological background and published examples of transparent reporting. The STROBE checklist is best used in conjunction with this article (freely available on the Web sites of PLoS Medicine at <http://www.plosmedicine.org/>, Annals of Internal Medicine at <http://www.annals.org/>, and Epidemiology at <http://www.epidem.com/>). Information on the STROBE Initiative is available at [www.strobe-statement.org](http://www.strobe-statement.org).
